# Supplementary material for: Topological Tumor Graphs: A Graph-Based Spatial Model to Infer Stromal Recruitment for Immunosuppression in Melanoma Histology
Source: Oxford University Press journal article supplement (doi:10.1158/0008-5472.can-19-2268), 2019-12-24
Supplement: 00085472can192268-sup-226045_2_supp_5947655_q2927p.xlsx [file 00085472can192268-sup-226045_2_supp_5947655_q2927p.xlsx]

## Sheet: S1
Table S1. Description of the patients, biopsy sites and dates for the sequential sample cohort.
ID	Age	BRAF V600E	Diagnosis Date	Sample1	Type 1	Bx_location_1	Bx_date_1	Sample2	Type 2	Bx_location_2	Bx_date_2
1	60	Negative	2015-12-01	1A	Primary	Skin	2015-12-30	1B	Metastasis	Skin	2016-05-03
2	52	Negative	2015-05-01	2A	Primary	Skin	2011-03-28	2B	Metastasis	Lymph Node	2015-06-19
5	53	Positive	2001-11-01	5A	Primary	Skin	2002-08-20	5B	Metastasis	Pleura	2013-04-22
6	42	Negative	2005-05-01	6B	Metastasis	Soft Tissue	2012-05-14	6C	Metastasis	Liver	2012-11-06
8	88	Negative	2016-05-01	8A	Primary	Skin	2016-06-01	8B	Metastasis	Intestine	2016-06-01
14	75	Negative	2008-05-01	14A	Primary	Skin	2008-06-17	14B	Metastasis	Skin	2008-06-17
16	53	Negative	2008-11-01	16A	Primary	Vagina	2008-11-25	16B	Recurrence	Vagina	2013-07-23
26	36	Positive	2012-01-01	26A	Metastasis	Skin	2012-02-14	26B	Metastasis	Lymph Node	2013-07-11
29	83	Negative	2008-04-01	29A	Primary	Nasal Fossa	2012-07-16	29B	Recurrence	Nasal Fossa	2013-05-06
33	74	Negative	2013-03-01	33A	Metastasis	Skin	2013-09-12	33B	Metastasis	Skin	2014-12-15
40	45	Positive	1995-01-01	40B	Metastasis	Skin	2016-01-11	40C	Metastasis	Lymph Node	2016-10-31
43	43	Negative	2016-06-01	43A	Primary	Skin	2016-06-01	43B	Metastasis	Anus	2016-10-25
