# Supplementary material for: Topological Tumor Graphs: A Graph-Based Spatial Model to Infer Stromal Recruitment for Immunosuppression in Melanoma Histology
Source: Oxford University Press journal article supplement (doi:10.1158/0008-5472.can-19-2268), 2019-12-24
Supplement: 00085472can192268-sup-226045_2_supp_5947656_q2927p.xlsx [file 00085472can192268-sup-226045_2_supp_5947656_q2927p.xlsx]

## Sheet: S2
Table S2. Genes identified by CNx to underpin stromal barrier
Genes	weights	logFC_DE	FDR_DE	PValue_DE	description	Amp	Del	CorGeCNA	PV_ZeroDel	PV_AmpZero	PV_AmpDel
DES	3668.84	-3.13659	5.17e-13	1.7e-15	desmin [Source:HGNC Symbol;Acc:HGNC:2770]	57	47	-0.00209474	0.761783	0.352123	0.41572
FGFR2	3594.35	-1.30233	0.00312646	2.58e-05	fibroblast growth factor receptor 2 [Source:HGNC Symbol;Acc:HGNC:3689]	4	184	0.194967	0.146225	0.0728862	0.0203575
ADRA1B	3825.45	-0.602041	0.145061	0.00310675	adrenoceptor alpha 1B [Source:HGNC Symbol;Acc:HGNC:278]	27	99	0.165829	0.446124	0.644858	0.937839
PRF1	-4670.38	-0.545352	0.247369	0.00928276	perforin 1 [Source:HGNC Symbol;Acc:HGNC:9360]	2	175	0.0939114	0.28838	0.920171	0.678076
XCL1	4014.62	-0.532729	0.300652	0.0143639	X-C motif chemokine ligand 1 [Source:HGNC Symbol;Acc:HGNC:10645]	161	16	-0.0584465	0.0360679	0.779377	0.0367183
NKD1	4100.87	-0.499142	0.292954	0.0130309	naked cuticle homolog 1 [Source:HGNC Symbol;Acc:HGNC:17045]	31	97	0.276177	0.121191	0.294811	0.893537
CD38	-5221.5	-0.483287	0.482055	0.0333547	CD38 molecule [Source:HGNC Symbol;Acc:HGNC:1667]	48	56	0.082886	0.739242	0.661183	0.479876
WDR86	-4502.81	-0.481967	0.421584	0.0266378	WD repeat domain 86 [Source:HGNC Symbol;Acc:HGNC:28020]	172	16	0.0821691	0.900704	0.696182	0.676701
MUC7	5949.64	-0.481746	0.927318	0.237132	mucin 7; secreted [Source:HGNC Symbol;Acc:HGNC:7518]	40	66	0.0478238	0.834076	0.440195	0.617873
ZNF117	4399.12	-0.423013	0.154715	0.00397331	zinc finger protein 117 [Source:HGNC Symbol;Acc:HGNC:12897]	159	14	0.216249	0.446134	0.880585	0.528079
TMEM37	-4068.76	-0.399326	0.145958	0.00336641	transmembrane protein 37 [Source:HGNC Symbol;Acc:HGNC:18216]	57	33	0.0663116	0.920193	0.113508	0.270492
ZDHHC15	-4882.14	-0.386249	0.860374	0.160238	zinc finger DHHC-type containing 15 [Source:HGNC Symbol;Acc:HGNC:20342]	40	60	0.0981568	0.281798	0.199117	0.791143
AKAP3	-4843.79	-0.385915	0.247369	0.00937314	A-kinase anchoring protein 3 [Source:HGNC Symbol;Acc:HGNC:373]	61	45	0.0293313	0.51889	0.297773	0.299129
KCNE1	-4316.13	-0.38084	0.740961	0.0785245	potassium voltage-gated channel subfamily E regulatory subunit 1 [Source:HGNC Symbol;Acc:HGNC:6240]	53	58	0.214931	0.94577	0.295086	0.2682
BARX2	-3748.33	-0.370905	0.921218	0.215392	BARX homeobox 2 [Source:HGNC Symbol;Acc:HGNC:956]	17	159	0.00308774	0.705389	0.392814	0.373015
HOXB5	3711.41	-0.370217	0.373689	0.0214722	homeobox B5 [Source:HGNC Symbol;Acc:HGNC:5116]	76	44	0.106827	0.409626	0.0014677	0.136352
GPBAR1	3765.7	-0.347075	0.347127	0.0188718	G protein-coupled bile acid receptor 1 [Source:HGNC Symbol;Acc:HGNC:19680]	57	46	-0.0272054	0.758971	0.352598	0.414708
MSMP	-4133.17	-0.326144	0.837028	0.134904	microseminoprotein; prostate associated [Source:HGNC Symbol;Acc:HGNC:29663]	32	160	0.334872	0.844898	0.680132	0.667814
EMILIN2	-3752.82	-0.319851	0.308226	0.0152336	elastin microfibril interfacer 2 [Source:HGNC Symbol;Acc:HGNC:19881]	45	81	0.206413	0.870926	0.597441	0.563088
AQP11	3811.5	-0.311384	0.496502	0.0351723	aquaporin 11 [Source:HGNC Symbol;Acc:HGNC:19940]	46	92	0.273022	0.83386	0.533367	0.391577
ZC3H12D	-4349.55	-0.286731	0.837028	0.138541	zinc finger CCCH-type containing 12D [Source:HGNC Symbol;Acc:HGNC:21175]	19	176	0.237158	0.398062	0.0113513	0.0592268
SEMA3D	3698.38	-0.285733	0.927318	0.254189	semaphorin 3D [Source:HGNC Symbol;Acc:HGNC:10726]	161	13	0.192378	0.217454	0.66679	0.266346
CYGB	-3601.24	-0.285315	0.818758	0.116002	cytoglobin [Source:HGNC Symbol;Acc:HGNC:16505]	106	31	0.102492	0.406395	0.0168452	0.421213
CRAT	-4410.96	-0.284821	0.154715	0.00407815	carnitine O-acetyltransferase [Source:HGNC Symbol;Acc:HGNC:2342]	23	130	0.335939	0.186014	0.541073	0.166736
TBC1D3C	-3940.12	-0.279984	0.787467	0.108974	TBC1 domain family member 3C [Source:HGNC Symbol;Acc:HGNC:24889]	50	55	0.302812	0.037136	0.024725	0.923443
IKZF1	5786.2	-0.260979	0.872066	0.176142	IKAROS family zinc finger 1 [Source:HGNC Symbol;Acc:HGNC:13176]	163	15	-0.101277	0.0517595	0.597409	0.0189123
GPR174	4810.59	-0.248535	0.949649	0.314807	G protein-coupled receptor 174 [Source:HGNC Symbol;Acc:HGNC:30245]	39	60	0.10009	0.293257	0.294717	0.886455
IGSF9B	3749.59	-0.247396	0.927318	0.267843	immunoglobulin superfamily member 9B [Source:HGNC Symbol;Acc:HGNC:32326]	20	153	0.168003	0.82734	0.238987	0.226844
RGS1	-4060.58	-0.246124	0.921218	0.216547	regulator of G protein signaling 1 [Source:HGNC Symbol;Acc:HGNC:9991]	161	19	-0.0217159	0.124505	0.408901	0.0558073
SRPK3	-3596.54	-0.242433	0.740961	0.0785073	SRSF protein kinase 3 [Source:HGNC Symbol;Acc:HGNC:11402]	45	61	0.0288733	0.84954	0.367427	0.421329
SHC2	-3905.24	-0.235626	0.909727	0.196883	SHC adaptor protein 2 [Source:HGNC Symbol;Acc:HGNC:29869]	42	85	0.0652121	0.346472	0.750946	0.753528
CSF2RB	-3637.79	-0.23417	0.89044	0.185912	colony stimulating factor 2 receptor beta common subunit [Source:HGNC Symbol;Acc:HGNC:2436]	113	21	-0.0968857	0.357283	0.976429	0.338209
SLA2	3744.14	-0.231364	0.927318	0.251171	Src like adaptor 2 [Source:HGNC Symbol;Acc:HGNC:17329]	140	5	-0.0853706	0.872197	0.877543	0.717651
CD80	4038.87	-0.22193	0.921218	0.22006	CD80 molecule [Source:HGNC Symbol;Acc:HGNC:1700]	57	46	0.128996	0.925204	0.0237006	0.0723143
ADRA2C	-4476.43	-0.221267	0.949649	0.337834	adrenoceptor alpha 2C [Source:HGNC Symbol;Acc:HGNC:283]	44	66	0.167054	0.380403	0.66285	0.240487
NAIP	4152.52	-0.220247	0.751565	0.0894809	NLR family apoptosis inhibitory protein [Source:HGNC Symbol;Acc:HGNC:7634]	42	82	0.260183	0.549406	0.985386	0.675457
CD4	4522.09	-0.213504	0.860374	0.161329	CD4 molecule [Source:HGNC Symbol;Acc:HGNC:1678]	61	42	-0.0926685	0.507756	0.442567	0.371617
GABRP	3819.96	-0.211982	0.963185	0.404313	gamma-aminobutyric acid type A receptor pi subunit [Source:HGNC Symbol;Acc:HGNC:4089]	37	87	0.142342	0.567849	0.632351	0.939889
GSN	-5590.18	-0.20729	0.410953	0.0250499	gelsolin [Source:HGNC Symbol;Acc:HGNC:4620]	22	132	0.206775	0.452124	0.633641	0.331245
RCAN1	3740.3	-0.202317	0.837028	0.1459	regulator of calcineurin 1 [Source:HGNC Symbol;Acc:HGNC:3040]	53	58	0.23515	0.94577	0.295086	0.2682
NNMT	4102.96	-0.201662	0.921218	0.218896	nicotinamide N-methyltransferase [Source:HGNC Symbol;Acc:HGNC:7861]	16	161	0.0860955	0.769521	0.256167	0.24233
PPM1E	-4707.21	-0.197355	0.927318	0.261679	protein phosphatase; Mg2+/Mn2+ dependent 1E [Source:HGNC Symbol;Acc:HGNC:19322]	101	35	0.213283	0.644164	0.0108954	0.226229
MS4A6A	4024.92	-0.196339	0.921218	0.20776	membrane spanning 4-domains A6A [Source:HGNC Symbol;Acc:HGNC:13375]	35	95	0.000993207	0.569813	0.74558	0.973356
CD19	3535.44	-0.19616	0.984412	0.561733	CD19 molecule [Source:HGNC Symbol;Acc:HGNC:1633]	49	48	-0.0268524	0.994221	0.773701	0.998347
ACSL1	-3838.37	-0.193055	0.518536	0.0406138	acyl-CoA synthetase long chain family member 1 [Source:HGNC Symbol;Acc:HGNC:3569]	42	81	0.241075	0.943569	0.866213	0.956907
PRR5L	3793.66	-0.193028	0.836138	0.122803	proline rich 5 like [Source:HGNC Symbol;Acc:HGNC:25878]	36	89	0.127805	0.503464	0.272386	0.388323
BST2	-3882.18	-0.192821	0.909727	0.199331	bone marrow stromal cell antigen 2 [Source:HGNC Symbol;Acc:HGNC:1119]	50	57	0.138134	0.741299	0.494988	0.768292
TOX	-4176.09	-0.191893	0.949649	0.336864	thymocyte selection associated high mobility group box [Source:HGNC Symbol;Acc:HGNC:18988]	131	24	-0.0664627	0.916367	0.645807	0.604536
FCGR3A	3957.41	-0.190668	0.927318	0.271741	Fc fragment of IgG receptor IIIa [Source:HGNC Symbol;Acc:HGNC:3619]	160	16	-0.12029	0.0144924	0.926426	0.031894
SYTL1	-6036.49	-0.18193	0.949649	0.355104	synaptotagmin like 1 [Source:HGNC Symbol;Acc:HGNC:15584]	62	49	0.150825	0.783741	0.515021	0.969824
HMGB3	4630.51	-0.181849	0.751565	0.0875001	high mobility group box 3 [Source:HGNC Symbol;Acc:HGNC:5004]	43	60	-0.0261911	0.909903	0.665321	0.795378
GATM	3999.4	-0.181828	0.949649	0.303725	glycine amidinotransferase [Source:HGNC Symbol;Acc:HGNC:4175]	58	69	0.239631	0.157709	0.934087	0.228329
CP	4318.14	-0.180826	0.963185	0.483134	ceruloplasmin [Source:HGNC Symbol;Acc:HGNC:2295]	58	46	0.0937715	0.357866	0.0162904	0.237785
ZNF334	-3541.15	-0.177066	0.963185	0.44788	zinc finger protein 334 [Source:HGNC Symbol;Acc:HGNC:15806]	143	5	0.157338	0.866502	0.977756	0.731828
SP6	4191.59	-0.176061	0.949649	0.372672	Sp6 transcription factor [Source:HGNC Symbol;Acc:HGNC:14530]	73	45	-0.0052401	0.470765	0.00191929	0.131008
ZNF135	4344.47	-0.17248	0.949649	0.343004	zinc finger protein 135 [Source:HGNC Symbol;Acc:HGNC:12919]	46	65	-0.0894748	0.77588	0.222964	0.19678
GUCA1B	-4261.07	-0.167588	0.927318	0.249718	guanylate cyclase activator 1B [Source:HGNC Symbol;Acc:HGNC:4679]	142	31	0.0677525	0.13361	0.115393	0.593661
CD96	-3684.19	-0.16755	0.963185	0.416992	CD96 molecule [Source:HGNC Symbol;Acc:HGNC:16892]	59	44	0.159595	0.869023	0.0882071	0.265109
CENPA	-4366.84	-0.166148	0.751565	0.0880257	centromere protein A [Source:HGNC Symbol;Acc:HGNC:1851]	58	40	0.255492	0.879524	0.322192	0.576465
ZNF300	-3693.6	-0.165378	0.931486	0.283896	zinc finger protein 300 [Source:HGNC Symbol;Acc:HGNC:13091]	32	100	0.125654	0.432438	0.526792	0.878407
MYL5	4660.97	-0.164251	0.577934	0.0523663	myosin light chain 5 [Source:HGNC Symbol;Acc:HGNC:7586]	42	68	0.18948	0.571046	0.549311	0.297274
RPS6KA1	3588.62	-0.163063	0.751565	0.0873524	ribosomal protein S6 kinase A1 [Source:HGNC Symbol;Acc:HGNC:10430]	60	49	0.343847	0.765465	0.442409	0.914518
RASGRP1	3728.19	-0.163021	0.949649	0.373555	RAS guanyl releasing protein 1 [Source:HGNC Symbol;Acc:HGNC:9878]	60	67	0.163717	0.176297	0.858094	0.347197
CCL4L2	-3976.02	-0.156461	0.963185	0.401529	C-C motif chemokine ligand 4 like 2 [Source:HGNC Symbol;Acc:HGNC:24066]	50	55	0.0257893	0.037136	0.024725	0.923443
PDZRN3	5166.6	-0.15638	0.927318	0.27726	PDZ domain containing ring finger 3 [Source:HGNC Symbol;Acc:HGNC:17704]	70	41	0.0613191	0.222879	0.0292235	0.648044
ARHGAP30	-5142.8	-0.150537	0.949649	0.357663	Rho GTPase activating protein 30 [Source:HGNC Symbol;Acc:HGNC:27414]	160	18	-0.112567	0.00871086	0.873929	0.0195874
MAMLD1	4446.98	-0.149819	0.860374	0.165838	mastermind like domain containing 1 [Source:HGNC Symbol;Acc:HGNC:2568]	44	59	-0.023157	0.878959	0.703179	0.861107
CDC42EP1	4245.26	-0.14874	0.927318	0.276264	CDC42 effector protein 1 [Source:HGNC Symbol;Acc:HGNC:17014]	115	20	-0.00154003	0.291028	0.985544	0.306665
DCP2	5225.52	-0.148385	0.770785	0.100316	decapping mRNA 2 [Source:HGNC Symbol;Acc:HGNC:24452]	39	87	0.331159	0.928517	0.517161	0.511588
STIL	3970.51	-0.148272	0.8247	0.118202	STIL; centriolar assembly protein [Source:HGNC Symbol;Acc:HGNC:10879]	61	48	0.401864	0.659325	0.854076	0.665985
FZD2	-4104.25	-0.1449	0.927318	0.278043	frizzled class receptor 2 [Source:HGNC Symbol;Acc:HGNC:4040]	61	49	0.109411	0.213984	0.0080946	0.353972
EPHA5	-5416.76	-0.144816	0.984412	0.552987	EPH receptor A5 [Source:HGNC Symbol;Acc:HGNC:3389]	40	63	0.270049	0.901135	0.419572	0.554391
PDE7A	4984.22	-0.144002	0.909727	0.194381	phosphodiesterase 7A [Source:HGNC Symbol;Acc:HGNC:8791]	134	23	0.142654	0.838719	0.867113	0.656049
ARAP1	3639.2	-0.143686	0.518536	0.0394631	ArfGAP with RhoGAP domain; ankyrin repeat and PH domain 1 [Source:HGNC Symbol;Acc:HGNC:16925]	44	92	0.423576	0.967684	0.268897	0.284885
ARRB1	-3741.15	-0.143054	0.860374	0.164516	arrestin beta 1 [Source:HGNC Symbol;Acc:HGNC:711]	45	92	0.339923	0.913975	0.300863	0.231965
IL1RAPL1	5120.86	-0.138542	0.984412	0.683606	interleukin 1 receptor accessory protein like 1 [Source:HGNC Symbol;Acc:HGNC:5996]	42	58	0.0768101	0.744359	0.08866	0.217475
EGFL7	3760.48	-0.135472	0.939393	0.287854	EGF like domain multiple 7 [Source:HGNC Symbol;Acc:HGNC:20594]	25	128	0.297814	0.236103	0.226133	0.0570034
RAPGEF4	-3587.35	-0.134381	0.980894	0.516471	Rap guanine nucleotide exchange factor 4 [Source:HGNC Symbol;Acc:HGNC:16626]	61	39	0.16444	0.974969	0.161936	0.373161
ZNF415	3694.15	-0.133961	0.963185	0.468727	zinc finger protein 415 [Source:HGNC Symbol;Acc:HGNC:20636]	47	63	0.0136473	0.501103	0.374706	0.190431
CXorf21	4236.19	-0.133833	0.963185	0.435224	chromosome X open reading frame 21 [Source:HGNC Symbol;Acc:HGNC:25667]	42	58	0.054692	0.744359	0.08866	0.217475
ANKDD1A	-3765.01	-0.130393	0.872066	0.173231	ankyrin repeat and death domain containing 1A [Source:HGNC Symbol;Acc:HGNC:28002]	75	38	0.238029	0.458548	0.843681	0.438105
AMD1	-5035.66	-0.128714	0.921218	0.214133	adenosylmethionine decarboxylase 1 [Source:HGNC Symbol;Acc:HGNC:457]	20	167	0.158088	0.209788	0.000198942	0.00947441
CDKN3	4111.09	-0.126213	0.865044	0.168163	cyclin dependent kinase inhibitor 3 [Source:HGNC Symbol;Acc:HGNC:1791]	40	87	0.290882	0.752116	0.485182	0.537005
MOV10	4437.51	-0.123674	0.671517	0.0670029	Mov10 RISC complex RNA helicase [Source:HGNC Symbol;Acc:HGNC:7200]	64	63	0.436177	0.750668	0.666768	0.588569
TRIM36	-3761.01	-0.123033	0.953461	0.38484	tripartite motif containing 36 [Source:HGNC Symbol;Acc:HGNC:16280]	38	89	0.0604423	0.811414	0.515122	0.442821
DNTTIP2	3856.99	-0.121832	0.848744	0.149614	deoxynucleotidyltransferase terminal interacting protein 2 [Source:HGNC Symbol;Acc:HGNC:24013]	59	69	0.507054	0.862043	0.606906	0.743951
RALGPS1	-5695.38	-0.121669	0.927318	0.246624	Ral GEF with PH domain and SH3 binding motif 1 [Source:HGNC Symbol;Acc:HGNC:16851]	23	132	0.332457	0.539826	0.693744	0.46177
PLK1	3719.59	-0.121269	0.921218	0.205386	polo like kinase 1 [Source:HGNC Symbol;Acc:HGNC:9077]	49	50	0.0874157	0.757484	0.789859	0.465158
MMP13	-4117.73	-0.120991	0.984412	0.727913	matrix metallopeptidase 13 [Source:HGNC Symbol;Acc:HGNC:7159]	30	134	-0.0507036	0.948415	0.578974	0.562294
ENC1	-3625.79	-0.119886	0.949649	0.360077	ectodermal-neural cortex 1 [Source:HGNC Symbol;Acc:HGNC:3345]	41	80	0.22578	0.595229	0.823507	0.860257
GPR18	4844.38	-0.117987	0.984412	0.56145	G protein-coupled receptor 18 [Source:HGNC Symbol;Acc:HGNC:4472]	80	62	-0.0955636	0.827332	0.154795	0.181394
CDCA7	3727.66	-0.117563	0.951926	0.382652	cell division cycle associated 7 [Source:HGNC Symbol;Acc:HGNC:14628]	60	39	0.239216	0.961046	0.185379	0.389352
FGD6	3592.92	-0.116642	0.949649	0.332659	FYVE; RhoGEF and PH domain containing 6 [Source:HGNC Symbol;Acc:HGNC:21740]	23	71	0.0855076	0.775693	0.083761	0.130199
ARL6IP1	3749.69	-0.116465	0.671517	0.0642457	ADP ribosylation factor like GTPase 6 interacting protein 1 [Source:HGNC Symbol;Acc:HGNC:697]	52	48	0.256634	0.790834	0.762236	0.816069
MRAP2	-3927.26	-0.113353	0.984412	0.63986	melanocortin 2 receptor accessory protein 2 [Source:HGNC Symbol;Acc:HGNC:21232]	31	143	0.109356	0.081183	0.0047132	0.191631
ANPEP	3755.6	-0.113113	0.984412	0.590114	alanyl aminopeptidase; membrane [Source:HGNC Symbol;Acc:HGNC:500]	93	30	0.0836222	0.415047	0.743385	0.58818
NLGN2	3542.11	-0.111417	0.927318	0.267374	neuroligin 2 [Source:HGNC Symbol;Acc:HGNC:14290]	32	104	0.298997	0.0829237	0.0230111	0.469306
TES	3536.01	-0.111068	0.949649	0.378577	testin LIM domain protein [Source:HGNC Symbol;Acc:HGNC:14620]	169	16	0.259983	0.656594	0.789761	0.938944
CCDC28B	3892.82	-0.109314	0.927318	0.248173	coiled-coil domain containing 28B [Source:HGNC Symbol;Acc:HGNC:28163]	63	49	0.264933	0.81148	0.863772	0.787705
GABARAP	-5483.99	-0.109056	0.751565	0.0850227	GABA type A receptor-associated protein [Source:HGNC Symbol;Acc:HGNC:4067]	33	101	0.497356	0.10719	0.00424326	0.178192
SDC3	4187.41	-0.106365	0.949649	0.308884	syndecan 3 [Source:HGNC Symbol;Acc:HGNC:10660]	64	49	0.214273	0.844937	0.971359	0.716877
TIMP4	4676.57	-0.104701	0.984412	0.70137	TIMP metallopeptidase inhibitor 4 [Source:HGNC Symbol;Acc:HGNC:11823]	56	54	-0.0415029	0.151882	0.199519	0.821367
PELI2	-4681.96	-0.0980265	0.949649	0.37946	pellino E3 ubiquitin protein ligase family member 2 [Source:HGNC Symbol;Acc:HGNC:8828]	39	88	0.226443	0.777501	0.5234	0.596337
GRN	4986.21	-0.0948924	0.927318	0.25781	granulin precursor [Source:HGNC Symbol;Acc:HGNC:4601]	59	51	0.280688	0.118173	0.0166638	0.577692
RPS8	-3539.95	-0.0946788	0.921218	0.211201	ribosomal protein S8 [Source:HGNC Symbol;Acc:HGNC:10441]	61	47	0.220842	0.687141	0.796642	0.73086
PXK	-3866.08	-0.0944654	0.949649	0.332792	PX domain containing serine/threonine kinase like [Source:HGNC Symbol;Acc:HGNC:23326]	60	49	0.313196	0.0557151	0.0125911	0.78827
COG5	-3607.38	-0.0911562	0.921218	0.212347	component of oligomeric golgi complex 5 [Source:HGNC Symbol;Acc:HGNC:14857]	161	17	0.547605	0.610535	0.639195	0.901736
PLAGL1	4397.6	-0.090674	0.984412	0.586128	PLAG1 like zinc finger 1 [Source:HGNC Symbol;Acc:HGNC:9046]	20	173	0.163204	0.542291	0.00464311	0.0245279
EFNA1	-3866.63	-0.0902191	0.963185	0.429777	ephrin A1 [Source:HGNC Symbol;Acc:HGNC:3221]	164	11	0.267179	0.218706	0.758986	0.344599
TPCN2	-3645.37	-0.0873611	0.984412	0.570065	two pore segment channel 2 [Source:HGNC Symbol;Acc:HGNC:20820]	45	90	0.224742	0.766317	0.378005	0.460025
ARL4C	-3659.26	-0.0866124	0.974826	0.50267	ADP ribosylation factor like GTPase 4C [Source:HGNC Symbol;Acc:HGNC:698]	52	60	0.0809406	0.3653	0.455411	0.270783
SLC38A9	3699.24	-0.0857946	0.927318	0.258155	solute carrier family 38 member 9 [Source:HGNC Symbol;Acc:HGNC:26907]	43	77	0.46014	0.516216	0.676675	0.971424
FLVCR2	-5783.56	-0.0854882	0.963185	0.476574	feline leukemia virus subgroup C cellular receptor family member 2 [Source:HGNC Symbol;Acc:HGNC:20105]	36	93	-0.000558531	0.748224	0.784805	0.810597
IQCB1	4390.5	-0.0849494	0.949649	0.349661	IQ motif containing B1 [Source:HGNC Symbol;Acc:HGNC:28949]	56	47	0.373402	0.861961	0.0252518	0.07882
GPX4	-6129.56	-0.0832284	0.927318	0.25122	glutathione peroxidase 4 [Source:HGNC Symbol;Acc:HGNC:4556]	45	85	0.11769	0.251893	0.740361	0.642738
IQSEC1	4099.45	-0.0826646	0.927318	0.266394	IQ motif and Sec7 domain 1 [Source:HGNC Symbol;Acc:HGNC:29112]	55	55	0.365034	0.168045	0.188224	0.91639
HIVEP3	3722.83	-0.0814567	0.963185	0.467441	human immunodeficiency virus type I enhancer binding protein 3 [Source:HGNC Symbol;Acc:HGNC:13561]	64	48	0.186645	0.641757	0.855873	0.654582
IL11RA	-3585.38	-0.0807288	0.984412	0.572237	interleukin 11 receptor subunit alpha [Source:HGNC Symbol;Acc:HGNC:5967]	30	163	0.221071	0.888188	0.38524	0.277749
HDAC7	4853.91	-0.0799764	0.949649	0.300391	histone deacetylase 7 [Source:HGNC Symbol;Acc:HGNC:14067]	39	59	0.232981	0.293776	0.612764	0.272141
NUP210	-4583.41	-0.0798086	0.984412	0.586318	nucleoporin 210 [Source:HGNC Symbol;Acc:HGNC:30052]	55	55	0.242174	0.223432	0.201896	0.994094
RNF32	3548.83	-0.0788682	0.963185	0.483046	ring finger protein 32 [Source:HGNC Symbol;Acc:HGNC:17118]	171	19	0.270274	0.883748	0.592849	0.632898
TLR7	-4355.06	-0.0783748	0.984412	0.663511	toll like receptor 7 [Source:HGNC Symbol;Acc:HGNC:15631]	41	60	0.0565283	0.43413	0.419175	0.805712
RAB26	-4069.36	-0.0768205	0.984412	0.64224	RAB26; member RAS oncogene family [Source:HGNC Symbol;Acc:HGNC:14259]	52	55	0.233104	0.940386	0.338544	0.560174
ZNF629	4112.65	-0.0767049	0.949649	0.304128	zinc finger protein 629 [Source:HGNC Symbol;Acc:HGNC:29008]	49	48	0.3816	0.994221	0.773701	0.998347
NUP214	-4673.61	-0.0752518	0.89044	0.186303	nucleoporin 214 [Source:HGNC Symbol;Acc:HGNC:8064]	23	131	0.610844	0.252304	0.597491	0.247763
NKAP	3621.77	-0.0749966	0.949649	0.323507	NFKB activating protein [Source:HGNC Symbol;Acc:HGNC:29873]	42	58	0.00948653	0.577594	0.725088	0.918199
LHPP	4195.99	-0.0747594	0.963185	0.475934	phospholysine phosphohistidine inorganic pyrophosphate phosphatase [Source:HGNC Symbol;Acc:HGNC:30042]	4	184	0.347287	0.146225	0.0728862	0.0203575
CWF19L2	4104.27	-0.074518	0.963185	0.426872	CWF19 like 2; cell cycle control (S. pombe) [Source:HGNC Symbol;Acc:HGNC:26508]	18	158	0.548443	0.793055	0.606389	0.591481
EHF	-4085.77	-0.0728689	0.984412	0.797987	ETS homologous factor [Source:HGNC Symbol;Acc:HGNC:3246]	35	90	-0.0559278	0.569855	0.293385	0.342631
RAD17	-4069.33	-0.0722193	0.949649	0.320098	RAD17 checkpoint clamp loader component [Source:HGNC Symbol;Acc:HGNC:9807]	43	81	0.508113	0.582369	0.911042	0.766224
PQBP1	-3642.61	-0.0721267	0.927318	0.254572	polyglutamine binding protein 1 [Source:HGNC Symbol;Acc:HGNC:9330]	39	58	-0.0359986	0.635077	0.183061	0.404307
GRB2	-3558.68	-0.0707658	0.878587	0.180928	growth factor receptor bound protein 2 [Source:HGNC Symbol;Acc:HGNC:4566]	107	29	0.411473	0.405013	0.0166506	0.426514
SLC9A5	-4277.98	-0.0701079	0.984412	0.622704	solute carrier family 9 member A5 [Source:HGNC Symbol;Acc:HGNC:11078]	36	85	0.233295	0.425677	0.656524	0.659706
NSA2	3829.01	-0.0698473	0.949649	0.358556	NSA2; ribosome biogenesis homolog [Source:HGNC Symbol;Acc:HGNC:30728]	41	80	0.526564	0.595229	0.823507	0.860257
WDR37	4120.27	-0.0697791	0.949649	0.340856	WD repeat domain 37 [Source:HGNC Symbol;Acc:HGNC:31406]	14	154	0.426897	0.563305	0.0609587	0.0877879
SNHG6	3753.59	-0.0694544	0.963185	0.472855	small nucleolar RNA host gene 6 [Source:HGNC Symbol;Acc:HGNC:32965]	134	23	0.325603	0.838719	0.867113	0.656049
CRYZ	-3839.84	-0.0671687	0.963185	0.441822	crystallin zeta [Source:HGNC Symbol;Acc:HGNC:2419]	60	58	0.33453	0.525725	0.573823	0.28691
HIF3A	-4286.89	-0.0667814	0.984412	0.831754	hypoxia inducible factor 3 subunit alpha [Source:HGNC Symbol;Acc:HGNC:15825]	42	64	0.108505	0.767623	0.55305	0.41668
TCTEX1D2	3602.89	-0.0664953	0.980894	0.521546	Tctex1 domain containing 2 [Source:HGNC Symbol;Acc:HGNC:28482]	62	42	0.137791	0.475929	0.0080545	0.158
CREB5	4701.64	-0.0653968	0.984412	0.731168	cAMP responsive element binding protein 5 [Source:HGNC Symbol;Acc:HGNC:16844]	167	14	0.283231	0.107831	0.461373	0.0342105
CMIP	3869.82	-0.065255	0.963185	0.425022	c-Maf inducing protein [Source:HGNC Symbol;Acc:HGNC:24319]	34	97	0.322071	0.144734	0.27552	0.797287
SPRED2	5384.88	-0.0652428	0.949649	0.358266	sprouty related EVH1 domain containing 2 [Source:HGNC Symbol;Acc:HGNC:17722]	58	33	0.448887	0.849233	0.41455	0.724396
DOPEY2	-3813.24	-0.0650988	0.949649	0.376981	dopey family member 2 [Source:HGNC Symbol;Acc:HGNC:1291]	53	57	0.310593	0.900888	0.464997	0.502396
RPAP3	-5288.7	-0.0643258	0.963185	0.470654	RNA polymerase II associated protein 3 [Source:HGNC Symbol;Acc:HGNC:26151]	39	59	0.342264	0.293776	0.612764	0.272141
GTF3C5	3631.13	-0.0635801	0.949649	0.340951	general transcription factor IIIC subunit 5 [Source:HGNC Symbol;Acc:HGNC:4668]	22	131	0.622923	0.372559	0.58348	0.314196
RAPGEF3	3870.43	-0.0613684	0.984412	0.685444	Rap guanine nucleotide exchange factor 3 [Source:HGNC Symbol;Acc:HGNC:16629]	39	59	0.0662799	0.293776	0.612764	0.272141
COL5A3	3569.87	-0.0609631	0.984412	0.723386	collagen type V alpha 3 chain [Source:HGNC Symbol;Acc:HGNC:14864]	48	64	0.123421	0.485129	0.734736	0.77993
ZNF92	3590.67	-0.0603796	0.984412	0.585484	zinc finger protein 92 [Source:HGNC Symbol;Acc:HGNC:13168]	159	14	0.321187	0.446134	0.880585	0.528079
CHTF8	-3587.32	-0.0597575	0.927318	0.273602	chromosome transmission fidelity factor 8 [Source:HGNC Symbol;Acc:HGNC:24353]	35	87	0.418399	0.5956	0.438736	0.998361
HAAO	3685.05	-0.0586504	0.984412	0.74057	3-hydroxyanthranilate 3;4-dioxygenase [Source:HGNC Symbol;Acc:HGNC:4796]	60	33	0.00593532	0.748582	0.614287	0.984487
MRPS9	3925.02	-0.0586395	0.949649	0.3016	mitochondrial ribosomal protein S9 [Source:HGNC Symbol;Acc:HGNC:14501]	57	34	0.352506	0.998546	0.238507	0.382065
DNAJC13	-5135.07	-0.0586062	0.975091	0.50575	DnaJ heat shock protein family (Hsp40) member C13 [Source:HGNC Symbol;Acc:HGNC:30343]	56	50	0.276135	0.676442	0.0332105	0.0331794
PIAS4	4225.86	-0.0585933	0.949649	0.324496	protein inhibitor of activated STAT 4 [Source:HGNC Symbol;Acc:HGNC:17002]	48	73	0.33617	0.389035	0.447446	0.899491
RPL7A	3740.31	-0.0577193	0.963185	0.461894	ribosomal protein L7a [Source:HGNC Symbol;Acc:HGNC:10364]	22	132	0.524021	0.372559	0.58348	0.314196
GSTM3	-3973.75	-0.0562737	0.984412	0.691155	glutathione S-transferase mu 3 [Source:HGNC Symbol;Acc:HGNC:4635]	62	65	0.164124	0.77833	0.382773	0.339037
LCA5	3671.12	-0.0561893	0.984412	0.649069	LCA5; lebercilin [Source:HGNC Symbol;Acc:HGNC:31923]	33	134	0.388665	0.0719813	0.000652313	0.0871301
IQGAP3	-4560.54	-0.0560008	0.984412	0.579596	IQ motif containing GTPase activating protein 3 [Source:HGNC Symbol;Acc:HGNC:20669]	161	14	0.35708	0.202278	0.928043	0.288441
CDC7	-3607.92	-0.0557942	0.984412	0.576216	cell division cycle 7 [Source:HGNC Symbol;Acc:HGNC:1745]	57	73	0.40867	0.635751	0.642741	0.949006
SWAP70	3796.32	-0.0543414	0.984412	0.596539	switching B cell complex subunit SWAP70 [Source:HGNC Symbol;Acc:HGNC:17070]	34	91	0.34798	0.442626	0.323357	0.324691
ZNF829	4697.86	-0.0529798	0.984412	0.697117	zinc finger protein 829 [Source:HGNC Symbol;Acc:HGNC:34032]	43	56	0.0341165	0.649779	0.614814	0.435258
ZC3H18	3694.7	-0.0528918	0.949649	0.322917	zinc finger CCCH-type containing 18 [Source:HGNC Symbol;Acc:HGNC:25091]	28	105	0.644282	0.386971	0.677274	0.667875
PILRB	-4382.25	-0.052649	0.984412	0.623361	paired immunoglobin-like type 2 receptor beta [Source:HGNC Symbol;Acc:HGNC:18297]	161	15	0.333939	0.479973	0.494574	0.658557
TAP1	-3650.09	-0.0517299	0.984412	0.70935	transporter 1; ATP binding cassette subfamily B member [Source:HGNC Symbol;Acc:HGNC:43]	151	23	0.100173	0.0521096	0.0491631	0.380679
ING4	3651.6	-0.0507216	0.963185	0.47037	inhibitor of growth family member 4 [Source:HGNC Symbol;Acc:HGNC:19423]	61	42	0.296827	0.507756	0.442567	0.371617
PELI1	4622.82	-0.0503275	0.984412	0.606737	pellino E3 ubiquitin protein ligase 1 [Source:HGNC Symbol;Acc:HGNC:8827]	59	32	0.219189	0.761539	0.651547	0.964661
EIF4ENIF1	4800.24	-0.0482697	0.949649	0.365217	eukaryotic translation initiation factor 4E nuclear import factor 1 [Source:HGNC Symbol;Acc:HGNC:16687]	101	29	0.55904	0.105718	0.976287	0.0922181
DPF1	4678.06	-0.0482039	0.984412	0.73843	double PHD fingers 1 [Source:HGNC Symbol;Acc:HGNC:20225]	45	58	0.0630568	0.408982	0.404936	0.176959
SFPQ	6386.32	-0.0480711	0.949649	0.366435	splicing factor proline and glutamine rich [Source:HGNC Symbol;Acc:HGNC:10774]	62	48	0.258769	0.604148	0.722982	0.701347
NFKBID	-4877.07	-0.0478737	0.984412	0.682001	NFKB inhibitor delta [Source:HGNC Symbol;Acc:HGNC:15671]	44	58	0.0682132	0.801227	0.541046	0.459404
EFCAB7	4285.85	-0.0469801	0.984412	0.653785	EF-hand calcium binding domain 7 [Source:HGNC Symbol;Acc:HGNC:29379]	62	52	0.329661	0.792176	0.6381	0.409661
MAPT	4223.99	-0.0466489	0.984412	0.796186	microtubule associated protein tau [Source:HGNC Symbol;Acc:HGNC:6893]	67	48	0.180936	0.215224	0.00323351	0.269309
POLR2G	3645.67	-0.0466396	0.949649	0.380172	RNA polymerase II subunit G [Source:HGNC Symbol;Acc:HGNC:9194]	33	101	0.453939	0.556306	0.953372	0.733189
SEC11A	-3899.88	-0.046347	0.963185	0.404281	SEC11 homolog A; signal peptidase complex subunit [Source:HGNC Symbol;Acc:HGNC:17718]	92	33	0.485294	0.24073	0.616428	0.478089
RNF166	-3959.34	-0.0457954	0.980894	0.520113	ring finger protein 166 [Source:HGNC Symbol;Acc:HGNC:28856]	28	105	0.365562	0.386971	0.677274	0.667875
KCNMA1	-4821.33	-0.0455981	0.984412	0.817664	potassium calcium-activated channel subfamily M alpha 1 [Source:HGNC Symbol;Acc:HGNC:6284]	3	177	0.0442067	0.258577	0.514097	0.278524
KIF1C	-4826.23	-0.0442698	0.980894	0.51242	kinesin family member 1C [Source:HGNC Symbol;Acc:HGNC:6317]	40	93	0.36197	0.0623246	0.00876322	0.388875
MSL3	3721.97	-0.0441513	0.984412	0.55464	MSL complex subunit 3 [Source:HGNC Symbol;Acc:HGNC:7370]	41	58	0.047537	0.668891	0.302886	0.518583
SH3GLB1	-3582.33	-0.0427069	0.984412	0.581931	SH3 domain containing GRB2 like; endophilin B1 [Source:HGNC Symbol;Acc:HGNC:10833]	57	69	0.494791	0.754898	0.684178	0.928145
ZNF280C	-3763.81	-0.0419781	0.984412	0.595892	zinc finger protein 280C [Source:HGNC Symbol;Acc:HGNC:25955]	41	59	0.0533617	0.704817	0.762601	0.996456
ADCY1	4136.9	-0.0417486	0.984412	0.822982	adenylate cyclase 1 [Source:HGNC Symbol;Acc:HGNC:232]	162	16	0.0863717	0.0150015	0.759933	0.006932
RABGGTA	-3665.83	-0.041661	0.984412	0.548614	Rab geranylgeranyltransferase subunit alpha [Source:HGNC Symbol;Acc:HGNC:9795]	37	89	0.483094	0.665081	0.676315	0.611397
SIK3	4135.9	-0.0410382	0.980894	0.521958	SIK family kinase 3 [Source:HGNC Symbol;Acc:HGNC:29165]	15	163	0.631285	0.785769	0.286668	0.280188
LIG1	3587.73	-0.0404764	0.984412	0.574578	DNA ligase 1 [Source:HGNC Symbol;Acc:HGNC:6598]	46	63	0.256092	0.56032	0.327967	0.172049
CPSF3	5303.93	-0.0399769	0.963185	0.479342	cleavage and polyadenylation specific factor 3 [Source:HGNC Symbol;Acc:HGNC:2326]	59	41	0.431453	0.801818	0.429805	0.733596
RIOK1	4057.24	-0.0386459	0.984412	0.647158	RIO kinase 1 [Source:HGNC Symbol;Acc:HGNC:18656]	168	15	0.479515	0.768006	0.0239757	0.375745
BDNF	-4056.2	-0.0385461	0.984412	0.873474	brain derived neurotrophic factor [Source:HGNC Symbol;Acc:HGNC:1033]	34	88	0.0934085	0.512533	0.393987	0.375039
NOB1	-4040.71	-0.0376905	0.975091	0.507626	NIN1 (RPN12) binding protein 1 homolog [Source:HGNC Symbol;Acc:HGNC:29540]	37	86	0.557657	0.699132	0.355317	0.811663
RWDD2A	-4226.23	-0.0364011	0.984412	0.663379	RWD domain containing 2A [Source:HGNC Symbol;Acc:HGNC:21385]	31	141	0.499339	0.0794219	0.00437259	0.222262
ADD1	-3848.51	-0.0359073	0.968732	0.497932	adducin 1 [Source:HGNC Symbol;Acc:HGNC:243]	43	65	0.459024	0.399253	0.60755	0.235111
MYH11	-3725.8	-0.0358099	0.984412	0.856421	myosin heavy chain 11 [Source:HGNC Symbol;Acc:HGNC:7569]	52	48	0.116082	0.790834	0.762236	0.816069
TMEM214	-3639.85	-0.0351139	0.984412	0.575833	transmembrane protein 214 [Source:HGNC Symbol;Acc:HGNC:25983]	58	39	0.315909	0.897925	0.324826	0.563825
PPP2R5C	-5012.36	-0.0344242	0.984412	0.556299	protein phosphatase 2 regulatory subunit B'gamma [Source:HGNC Symbol;Acc:HGNC:9311]	38	92	0.534564	0.454875	0.94266	0.634953
RCHY1	3914.36	-0.0335494	0.984412	0.70324	ring finger and CHY zinc finger domain containing 1 [Source:HGNC Symbol;Acc:HGNC:17479]	38	68	0.342641	0.8603	0.322923	0.470446
TP53	3576.8	-0.0330386	0.984412	0.71394	tumor protein p53 [Source:HGNC Symbol;Acc:HGNC:11998]	32	104	0.458346	0.0829237	0.0230111	0.469306
TMEM45A	-3913.6	-0.032391	0.984412	0.852391	transmembrane protein 45A [Source:HGNC Symbol;Acc:HGNC:25480]	62	43	0.0441638	0.338367	0.0288413	0.422497
MAPRE2	4138.81	-0.0322596	0.984412	0.666568	microtubule associated protein RP/EB family member 2 [Source:HGNC Symbol;Acc:HGNC:6891]	36	80	0.344458	0.539084	0.857582	0.935412
ZNF41	3572.16	-0.0321473	0.984412	0.701443	zinc finger protein 41 [Source:HGNC Symbol;Acc:HGNC:13107]	39	60	-0.0178116	0.695577	0.200964	0.39064
CPNE7	-5337.38	-0.0319298	0.984412	0.871953	copine 7 [Source:HGNC Symbol;Acc:HGNC:2320]	28	104	0.0669505	0.386971	0.677274	0.667875
TMEM121	4342.05	-0.0313808	0.984412	0.80453	transmembrane protein 121 [Source:HGNC Symbol;Acc:HGNC:20511]	39	91	0.141854	0.386507	0.958195	0.47199
NUP54	-3888	-0.0313672	0.984412	0.691318	nucleoporin 54 [Source:HGNC Symbol;Acc:HGNC:17359]	38	69	0.290927	0.732214	0.300755	0.529724
TM2D1	-4318.78	-0.0307096	0.984412	0.658235	TM2 domain containing 1 [Source:HGNC Symbol;Acc:HGNC:24142]	60	53	0.479428	0.772961	0.781265	0.494109
PANK4	3677.91	-0.0300757	0.984412	0.611653	pantothenate kinase 4 [Source:HGNC Symbol;Acc:HGNC:19366]	58	58	0.520372	0.698837	0.133528	0.507203
MED11	4219.52	-0.0294543	0.984412	0.64948	mediator complex subunit 11 [Source:HGNC Symbol;Acc:HGNC:32687]	38	94	0.560393	0.041899	0.00652106	0.421484
TOR1A	-4419.47	-0.0287733	0.984412	0.603829	torsin family 1 member A [Source:HGNC Symbol;Acc:HGNC:3098]	22	131	0.59404	0.214586	0.672736	0.260373
LSM14A	3664.08	-0.028467	0.984412	0.627075	LSM14A; mRNA processing body assembly factor [Source:HGNC Symbol;Acc:HGNC:24489]	46	59	0.446778	0.852667	0.44112	0.422271
EIF4A2	-4043.7	-0.028281	0.984412	0.752414	eukaryotic translation initiation factor 4A2 [Source:HGNC Symbol;Acc:HGNC:3284]	62	43	0.262566	0.268234	0.0182225	0.412934
THUMPD1	-4459.45	-0.0279625	0.984412	0.694689	THUMP domain containing 1 [Source:HGNC Symbol;Acc:HGNC:23807]	48	49	0.292368	0.82944	0.907769	0.740184
AKR7A2	-3888.59	-0.0276628	0.984412	0.680342	aldo-keto reductase family 7 member A2 [Source:HGNC Symbol;Acc:HGNC:389]	57	57	0.36396	0.605221	0.208314	0.242064
C2CD2	5702.51	-0.0275533	0.984412	0.850449	C2 calcium dependent domain containing 2 [Source:HGNC Symbol;Acc:HGNC:1266]	53	60	0.23996	0.732962	0.325971	0.201429
ZMYND19	-4432.43	-0.0254096	0.984412	0.719883	zinc finger MYND-type containing 19 [Source:HGNC Symbol;Acc:HGNC:21146]	25	129	0.510342	0.182561	0.377777	0.0962844
DBP	3672.39	-0.0243612	0.984412	0.784495	D-box binding PAR bZIP transcription factor [Source:HGNC Symbol;Acc:HGNC:2697]	44	65	0.271957	0.489831	0.417946	0.20311
SART3	-3784.91	-0.0240182	0.984412	0.628058	squamous cell carcinoma antigen recognized by T cells 3 [Source:HGNC Symbol;Acc:HGNC:16860]	31	67	0.560129	0.357011	0.14474	0.0840565
PLCB4	3839.72	-0.0238755	0.984412	0.918716	phospholipase C beta 4 [Source:HGNC Symbol;Acc:HGNC:9059]	108	22	0.191007	0.791402	0.485405	0.924644
MYO1B	5152.28	-0.0232914	0.984412	0.80651	myosin IB [Source:HGNC Symbol;Acc:HGNC:7596]	61	41	0.127547	0.916494	0.301986	0.457738
DCAF16	3947.12	-0.0231089	0.984412	0.778469	DDB1 and CUL4 associated factor 16 [Source:HGNC Symbol;Acc:HGNC:25987]	50	58	0.380369	0.980509	0.923208	0.831376
ERAP1	5218.69	-0.0219993	0.984412	0.834986	endoplasmic reticulum aminopeptidase 1 [Source:HGNC Symbol;Acc:HGNC:18173]	42	81	0.286289	0.675223	0.808423	0.613984
RER1	-4644.07	-0.0219214	0.984412	0.661256	retention in endoplasmic reticulum sorting receptor 1 [Source:HGNC Symbol;Acc:HGNC:30309]	58	58	0.606211	0.698837	0.133528	0.507203
PLD2	3706.63	-0.0218881	0.984412	0.782258	phospholipase D2 [Source:HGNC Symbol;Acc:HGNC:9068]	39	93	0.445651	0.0544198	0.0034764	0.286296
ZDHHC12	3655.71	-0.0203792	0.984412	0.822233	zinc finger DHHC-type containing 12 [Source:HGNC Symbol;Acc:HGNC:19159]	23	130	0.32992	0.186014	0.541073	0.166736
ARMC7	4127.8	-0.0201901	0.984412	0.731427	armadillo repeat containing 7 [Source:HGNC Symbol;Acc:HGNC:26168]	106	29	0.477325	0.405013	0.0166506	0.426514
UBE2W	-3604.68	-0.0194688	0.984412	0.817155	ubiquitin conjugating enzyme E2 W [Source:HGNC Symbol;Acc:HGNC:25616]	137	20	0.297988	0.777926	0.933837	0.999095
C19orf54	-3884.04	-0.0192628	0.984412	0.745498	chromosome 19 open reading frame 54 [Source:HGNC Symbol;Acc:HGNC:24758]	43	59	0.181901	0.396364	0.308522	0.122491
ANK2	-3689.24	-0.0188546	0.984412	0.889134	ankyrin 2 [Source:HGNC Symbol;Acc:HGNC:493]	38	79	0.39119	0.430628	0.442443	0.954702
UBE2D1	4452.16	-0.0188423	0.984412	0.810859	ubiquitin conjugating enzyme E2 D1 [Source:HGNC Symbol;Acc:HGNC:12474]	2	176	0.241393	0.712531	0.856365	0.717734
COLEC12	-3569.04	-0.0187043	0.984412	0.908756	collectin subfamily member 12 [Source:HGNC Symbol;Acc:HGNC:16016]	47	78	-0.0531208	0.968863	0.587642	0.619321
PAK2	-3805.6	-0.0184717	0.984412	0.7556	p21 (RAC1) activated kinase 2 [Source:HGNC Symbol;Acc:HGNC:8591]	66	40	0.385255	0.308559	0.0303886	0.48661
ZCCHC14	4369.83	-0.018379	0.984412	0.810764	zinc finger CCHC-type containing 14 [Source:HGNC Symbol;Acc:HGNC:24134]	29	104	0.355922	0.399167	0.502457	0.831326
ZNF256	4241.66	-0.0183111	0.984412	0.834839	zinc finger protein 256 [Source:HGNC Symbol;Acc:HGNC:13049]	46	64	0.205652	0.633934	0.238321	0.16444
YKT6	-4597.82	-0.0180875	0.984412	0.778573	YKT6 v-SNARE homolog [Source:HGNC Symbol;Acc:HGNC:16959]	162	17	0.581529	0.0460756	0.710351	0.0201574
FAM72A	-3867.54	-0.0171203	0.984412	0.874046	family with sequence similarity 72 member A [Source:HGNC Symbol;Acc:HGNC:24044]	163	17	0.235527	0.529018	0.123531	0.195209
KEAP1	-3863.36	-0.0164174	0.984412	0.741367	kelch like ECH associated protein 1 [Source:HGNC Symbol;Acc:HGNC:23177]	48	62	0.310487	0.512773	0.727204	0.814186
MRPS31	4718.42	-0.0157878	0.984412	0.807786	mitochondrial ribosomal protein S31 [Source:HGNC Symbol;Acc:HGNC:16632]	72	69	0.534871	0.632333	0.168538	0.124695
SAE1	3549.59	-0.0157844	0.984412	0.787604	SUMO1 activating enzyme subunit 1 [Source:HGNC Symbol;Acc:HGNC:30660]	43	65	0.318024	0.576315	0.485134	0.268896
LYRM4	-4301	-0.0154155	0.984412	0.829207	LYR motif containing 4 [Source:HGNC Symbol;Acc:HGNC:21365]	168	15	0.607767	0.826711	0.0410291	0.395224
MCCC1	4673.7	-0.0152252	0.984412	0.837738	methylcrotonoyl-CoA carboxylase 1 [Source:HGNC Symbol;Acc:HGNC:6936]	61	43	0.386211	0.359333	0.0177581	0.296343
RASL11A	5555.08	-0.0149916	0.984412	0.905902	RAS like family 11 member A [Source:HGNC Symbol;Acc:HGNC:23802]	73	62	0.0773787	0.593818	0.268169	0.656057
TSC2	-3707.98	-0.0142631	0.984412	0.801199	TSC complex subunit 2 [Source:HGNC Symbol;Acc:HGNC:12363]	51	55	0.363624	0.967056	0.265697	0.493668
RAB11B	4073.86	-0.0136442	0.984412	0.825221	RAB11B; member RAS oncogene family [Source:HGNC Symbol;Acc:HGNC:9761]	49	65	0.304472	0.367486	0.707793	0.723125
C2orf74	-4326.18	-0.0132824	0.984412	0.888907	chromosome 2 open reading frame 74 [Source:HGNC Symbol;Acc:HGNC:34439]	59	31	0.18422	0.620499	0.62335	0.838533
ZNF224	-3533.41	-0.0118256	0.984412	0.897638	zinc finger protein 224 [Source:HGNC Symbol;Acc:HGNC:13017]	45	60	0.281066	0.530055	0.294393	0.149937
CCDC12	4764.76	-0.0113985	0.984412	0.85078	coiled-coil domain containing 12 [Source:HGNC Symbol;Acc:HGNC:28332]	52	57	0.336288	0.0454533	0.0196353	0.777554
AP4S1	5562.7	-0.0112126	0.984412	0.892838	adaptor related protein complex 4 subunit sigma 1 [Source:HGNC Symbol;Acc:HGNC:575]	37	88	0.571811	0.547029	0.37699	0.265289
GPR173	-4333.47	-0.0105797	0.984412	0.960409	G protein-coupled receptor 173 [Source:HGNC Symbol;Acc:HGNC:18186]	42	57	0.0398072	0.714061	0.159658	0.33802
SLC25A23	3554.61	-0.010256	0.984412	0.908232	solute carrier family 25 member 23 [Source:HGNC Symbol;Acc:HGNC:19375]	47	69	0.0923078	0.497222	0.850427	0.509918
EIF5	-4400.98	-0.00994975	0.984412	0.891791	eukaryotic translation initiation factor 5 [Source:HGNC Symbol;Acc:HGNC:3299]	39	92	0.330661	0.392244	0.670784	0.792819
MTBP	-3615.21	-0.0098291	0.984412	0.926471	MDM2 binding protein [Source:HGNC Symbol;Acc:HGNC:7417]	148	22	0.337385	0.885196	0.672914	0.62833
ALDH18A1	-4514.2	-0.00980364	0.984412	0.866095	aldehyde dehydrogenase 18 family member A1 [Source:HGNC Symbol;Acc:HGNC:9722]	4	180	0.266625	0.0728502	0.393734	0.121177
PRKRA	-4358.86	-0.00970473	0.984412	0.865383	protein activator of interferon induced protein kinase EIF2AK2 [Source:HGNC Symbol;Acc:HGNC:9438]	59	42	0.368483	0.967929	0.261924	0.514536
RPL28	4293.53	-0.00882051	0.984412	0.91683	ribosomal protein L28 [Source:HGNC Symbol;Acc:HGNC:10330]	45	65	0.265363	0.805689	0.356459	0.324648
PANK2	4151.22	-0.00867399	0.984412	0.863401	pantothenate kinase 2 [Source:HGNC Symbol;Acc:HGNC:15894]	112	23	0.433801	0.999745	0.969141	0.976104
FAM72B	-5793.18	-0.00800115	0.984412	0.936563	family with sequence similarity 72 member B [Source:HGNC Symbol;Acc:HGNC:24805]	149	25	0.234553	0.416407	0.263757	0.24323
SH3YL1	4595.66	-0.00760519	0.984412	0.933525	SH3 and SYLF domain containing 1 [Source:HGNC Symbol;Acc:HGNC:29546]	59	41	0.187374	0.6885	0.736072	0.878866
CSNK2A2	-4118.56	-0.00740465	0.984412	0.897169	casein kinase 2 alpha 2 [Source:HGNC Symbol;Acc:HGNC:2459]	33	91	0.551598	0.305345	0.33788	0.957427
DGCR6	4081.2	-0.00689129	0.984412	0.948508	DiGeorge syndrome critical region gene 6 [Source:HGNC Symbol;Acc:HGNC:2846]	108	25	0.204457	0.0828127	0.824464	0.124466
APBB1	-4258.37	-0.00483098	0.984412	0.960268	amyloid beta precursor protein binding family B member 1 [Source:HGNC Symbol;Acc:HGNC:581]	35	88	0.260146	0.349678	0.374233	0.47275
COQ4	4045.96	-0.00453653	0.984412	0.951981	coenzyme Q4 [Source:HGNC Symbol;Acc:HGNC:19693]	24	131	0.453753	0.370214	0.51316	0.245993
DIRAS1	3866.64	-0.0045308	0.984412	0.972309	DIRAS family GTPase 1 [Source:HGNC Symbol;Acc:HGNC:19127]	45	77	0.237976	0.131037	0.896233	0.368794
PAK1IP1	-3573.55	-0.00427021	0.984412	0.963409	PAK1 interacting protein 1 [Source:HGNC Symbol;Acc:HGNC:20882]	169	14	0.442948	0.845298	0.0956982	0.334564
BTRC	-3628.65	-0.00416277	0.984412	0.940913	beta-transducin repeat containing E3 ubiquitin protein ligase [Source:HGNC Symbol;Acc:HGNC:1144]	3	181	0.477012	0.095944	0.00622523	0.00332248
SAP30	-4610.58	-0.00415914	0.984412	0.967489	Sin3A associated protein 30 [Source:HGNC Symbol;Acc:HGNC:10532]	41	75	0.138649	0.991257	0.579381	0.76214
GORAB	4096.05	-0.00414695	0.984412	0.967275	golgin; RAB6 interacting [Source:HGNC Symbol;Acc:HGNC:25676]	161	16	0.270992	0.0311549	0.546612	0.0187422
KIAA0319L	-3940.02	-0.0040939	0.984412	0.943242	KIAA0319 like [Source:HGNC Symbol;Acc:HGNC:30071]	63	48	0.318974	0.628871	0.851635	0.635396
NSMAF	4395.89	-0.00357868	0.984412	0.956784	neutral sphingomyelinase activation associated factor [Source:HGNC Symbol;Acc:HGNC:8017]	131	24	0.492906	0.916367	0.645807	0.604536
GTDC1	3643.59	-0.00349322	0.984412	0.95955	glycosyltransferase like domain containing 1 [Source:HGNC Symbol;Acc:HGNC:20887]	68	34	0.197134	0.737939	0.475246	0.417711
MED24	5164.14	-0.00348029	0.984412	0.953983	mediator complex subunit 24 [Source:HGNC Symbol;Acc:HGNC:22963]	55	52	0.445964	0.0971583	0.0381187	0.800043
ENY2	-5513.97	-0.002215	0.984412	0.975121	ENY2; transcription and export complex 2 subunit [Source:HGNC Symbol;Acc:HGNC:24449]	145	20	0.562748	0.761236	0.634841	0.473128
ZNF248	-5295.88	-0.00214087	0.984412	0.981169	zinc finger protein 248 [Source:HGNC Symbol;Acc:HGNC:13041]	10	152	0.281596	0.876963	0.244017	0.307762
ELOF1	3724.99	-0.00198808	0.984412	0.975156	elongation factor 1 homolog [Source:HGNC Symbol;Acc:HGNC:28691]	48	64	0.298923	0.642826	0.434828	0.818759
SLC22A17	-3872.98	0.000280118	0.998802	0.998802	solute carrier family 22 member 17 [Source:HGNC Symbol;Acc:HGNC:23095]	37	90	0.0926252	0.591321	0.535133	0.423522
RWDD2B	-5700.6	0.000927064	0.991417	0.989784	RWD domain containing 2B [Source:HGNC Symbol;Acc:HGNC:1302]	55	58	0.388841	0.850707	0.736658	0.53493
PCBP1	-4791.78	0.00104218	0.984412	0.979092	poly(rC) binding protein 1 [Source:HGNC Symbol;Acc:HGNC:8647]	56	30	0.355456	0.386115	0.294798	0.915741
NDRG3	3610.49	0.00174781	0.984412	0.978049	NDRG family member 3 [Source:HGNC Symbol;Acc:HGNC:14462]	140	5	0.345996	0.872197	0.877543	0.717651
USP39	-4009.86	0.0022424	0.984412	0.959648	ubiquitin specific peptidase 39 [Source:HGNC Symbol;Acc:HGNC:20071]	56	34	0.483088	0.987044	0.208754	0.377915
RPL27A	-3970.66	0.00236703	0.984412	0.972883	ribosomal protein L27a [Source:HGNC Symbol;Acc:HGNC:10329]	35	90	0.343134	0.441351	0.396444	0.421927
POLE2	5183.48	0.00296468	0.984412	0.977542	DNA polymerase epsilon 2; accessory subunit [Source:HGNC Symbol;Acc:HGNC:9178]	41	87	0.296524	0.824278	0.197448	0.256218
MTMR12	3646.97	0.00304504	0.984412	0.968955	myotubularin related protein 12 [Source:HGNC Symbol;Acc:HGNC:18191]	74	56	0.472639	0.45171	0.584363	0.31406
ODF3B	5078.66	0.00318146	0.984412	0.980496	outer dense fiber of sperm tails 3B [Source:HGNC Symbol;Acc:HGNC:34388]	110	29	0.00564496	0.691082	0.813318	0.963054
DEPDC5	4026.22	0.00339537	0.984412	0.955547	DEP domain containing 5 [Source:HGNC Symbol;Acc:HGNC:18423]	103	27	0.512524	0.114025	0.988463	0.093164
MDM4	4103.45	0.00348862	0.984412	0.968834	MDM4; p53 regulator [Source:HGNC Symbol;Acc:HGNC:6974]	167	15	0.371276	0.326724	0.0580714	0.0696901
PPP5C	3673.47	0.00386721	0.984412	0.938428	protein phosphatase 5 catalytic subunit [Source:HGNC Symbol;Acc:HGNC:9322]	42	64	0.387736	0.767623	0.55305	0.41668
SS18L1	4095.9	0.00456951	0.984412	0.965833	SS18L1; nBAF chromatin remodeling complex subunit [Source:HGNC Symbol;Acc:HGNC:15592]	144	4	0.239378	0.842841	0.888343	0.759852
BET1	3845.16	0.00510022	0.984412	0.947397	Bet1 golgi vesicular membrane trafficking protein [Source:HGNC Symbol;Acc:HGNC:14562]	161	13	0.549413	0.215774	0.68675	0.265721
ZMYM6	-3788.22	0.00515312	0.984412	0.949234	zinc finger MYM-type containing 6 [Source:HGNC Symbol;Acc:HGNC:13050]	62	48	0.433055	0.604148	0.722982	0.701347
MRPS21	3572.83	0.00525248	0.984412	0.942558	mitochondrial ribosomal protein S21 [Source:HGNC Symbol;Acc:HGNC:14046]	158	12	0.537544	0.856974	0.947798	0.724529
TAF6	3949.89	0.00574967	0.984412	0.925259	TATA-box binding protein associated factor 6 [Source:HGNC Symbol;Acc:HGNC:11540]	162	15	0.47795	0.505398	0.583702	0.638942
KLHDC2	-5605.5	0.00605588	0.984412	0.926987	kelch domain containing 2 [Source:HGNC Symbol;Acc:HGNC:20231]	43	85	0.461052	0.641243	0.305257	0.279011
COG1	4466.4	0.00610179	0.984412	0.917792	component of oligomeric golgi complex 1 [Source:HGNC Symbol;Acc:HGNC:6545]	105	31	0.573093	0.252074	0.00925931	0.489243
FAM76A	-5191.86	0.00612826	0.984412	0.936626	family with sequence similarity 76 member A [Source:HGNC Symbol;Acc:HGNC:28530]	64	48	0.465956	0.762433	0.434312	0.918885
TSC22D3	-4044.35	0.00617934	0.984412	0.958511	TSC22 domain family member 3 [Source:HGNC Symbol;Acc:HGNC:3051]	38	62	-0.00545006	0.274905	0.221827	0.776831
LARS2	3693.63	0.00627774	0.984412	0.923116	leucyl-tRNA synthetase 2; mitochondrial [Source:HGNC Symbol;Acc:HGNC:17095]	56	56	0.476625	0.0920717	0.0442466	0.802694
IQSEC2	3677.93	0.00677241	0.984412	0.937212	IQ motif and Sec7 domain 2 [Source:HGNC Symbol;Acc:HGNC:29059]	42	57	-0.0897585	0.714061	0.159658	0.33802
EIF3D	4059.38	0.00718178	0.984412	0.905439	eukaryotic translation initiation factor 3 subunit D [Source:HGNC Symbol;Acc:HGNC:3278]	109	24	0.555612	0.564951	0.935215	0.626425
PTPN21	3626.42	0.0077818	0.984412	0.937847	protein tyrosine phosphatase; non-receptor type 21 [Source:HGNC Symbol;Acc:HGNC:9651]	39	92	0.279037	0.515865	0.853914	0.824616
PEX13	3761.84	0.00793089	0.984412	0.899686	peroxisomal biogenesis factor 13 [Source:HGNC Symbol;Acc:HGNC:8855]	59	31	0.353111	0.620499	0.62335	0.838533
SEC11C	3900.13	0.00811031	0.984412	0.925897	SEC11 homolog C; signal peptidase complex subunit [Source:HGNC Symbol;Acc:HGNC:23400]	38	82	0.311491	0.446602	0.851745	0.590234
NDUFB5	-3621.89	0.00815118	0.984412	0.8936	NADH:ubiquinone oxidoreductase subunit B5 [Source:HGNC Symbol;Acc:HGNC:7700]	60	45	0.391639	0.416909	0.0125126	0.198675
ZNF813	3584.25	0.00843924	0.984412	0.949916	zinc finger protein 813 [Source:HGNC Symbol;Acc:HGNC:33257]	47	64	0.196118	0.379823	0.399681	0.158884
WWP2	-3878.27	0.00862094	0.984412	0.894093	WW domain containing E3 ubiquitin protein ligase 2 [Source:HGNC Symbol;Acc:HGNC:16804]	37	86	0.465832	0.699132	0.355317	0.811663
BTNL9	3779.84	0.00906339	0.984412	0.956258	butyrophilin like 9 [Source:HGNC Symbol;Acc:HGNC:24176]	41	86	0.197541	0.702759	0.654027	0.970874
TRIM65	-3648.68	0.00930459	0.984412	0.87953	tripartite motif containing 65 [Source:HGNC Symbol;Acc:HGNC:27316]	106	31	0.326328	0.406395	0.0168452	0.421213
PHF13	3891.02	0.00991208	0.984412	0.859386	PHD finger protein 13 [Source:HGNC Symbol;Acc:HGNC:22983]	57	60	0.505161	0.885672	0.235539	0.41476
MYO5B	3552.89	0.0099165	0.984412	0.966698	myosin VB [Source:HGNC Symbol;Acc:HGNC:7603]	37	82	-0.141705	0.568661	0.902416	0.915904
ARF5	-3740.47	0.0108906	0.984412	0.874921	ADP ribosylation factor 5 [Source:HGNC Symbol;Acc:HGNC:658]	174	12	0.444273	0.949858	0.661778	0.522394
UBE3C	3622.1	0.0109024	0.984412	0.877758	ubiquitin protein ligase E3C [Source:HGNC Symbol;Acc:HGNC:16803]	171	19	0.510997	0.883748	0.592849	0.632898
SIX5	-5089.09	0.0113647	0.984412	0.870946	SIX homeobox 5 [Source:HGNC Symbol;Acc:HGNC:10891]	42	64	0.159449	0.767623	0.55305	0.41668
SPIRE2	4046.55	0.0116415	0.984412	0.91884	spire type actin nucleation factor 2 [Source:HGNC Symbol;Acc:HGNC:30623]	28	104	0.16521	0.386971	0.677274	0.667875
IFFO1	4510.05	0.011682	0.984412	0.880167	intermediate filament family orphan 1 [Source:HGNC Symbol;Acc:HGNC:24970]	61	42	0.380921	0.507756	0.442567	0.371617
RFC3	-4148.83	0.0120705	0.984412	0.897382	replication factor C subunit 3 [Source:HGNC Symbol;Acc:HGNC:9971]	76	65	0.428296	0.824945	0.209647	0.21665
FDXACB1	-3809.51	0.0121966	0.984412	0.867117	ferredoxin-fold anticodon binding domain containing 1 [Source:HGNC Symbol;Acc:HGNC:25110]	16	161	0.533944	0.780427	0.276502	0.267687
IRAK2	4945.96	0.0122013	0.984412	0.931139	interleukin 1 receptor associated kinase 2 [Source:HGNC Symbol;Acc:HGNC:6113]	54	52	0.0668504	0.0907727	0.115165	0.83725
SNX27	-4663.88	0.0125402	0.984412	0.830739	sorting nexin family member 27 [Source:HGNC Symbol;Acc:HGNC:20073]	161	11	0.448755	0.223901	0.757084	0.344541
FAU	-5374.95	0.0130274	0.984412	0.849569	FAU; ubiquitin like and ribosomal protein S30 fusion [Source:HGNC Symbol;Acc:HGNC:3597]	35	104	0.427142	0.511089	0.385093	0.668695
NDUFV2	-4663.6	0.0132052	0.984412	0.824393	NADH:ubiquinone oxidoreductase core subunit V2 [Source:HGNC Symbol;Acc:HGNC:7717]	44	81	0.503501	0.97196	0.721278	0.734459
RIOK3	3794.66	0.0132542	0.984412	0.858766	RIO kinase 3 [Source:HGNC Symbol;Acc:HGNC:11451]	35	76	0.383666	0.414164	0.663248	0.964115
APOO	4845.88	0.013732	0.984412	0.845061	apolipoprotein O [Source:HGNC Symbol;Acc:HGNC:28727]	41	58	-0.0973834	0.588123	0.259517	0.538513
SLC16A10	4087.38	0.0143118	0.984412	0.920694	solute carrier family 16 member 10 [Source:HGNC Symbol;Acc:HGNC:17027]	20	168	0.126915	0.151956	0.000131236	0.010881
POLL	-4031.01	0.0153393	0.984412	0.800381	DNA polymerase lambda [Source:HGNC Symbol;Acc:HGNC:9184]	3	181	0.518709	0.095944	0.00622523	0.00332248
PPME1	-3646.93	0.0155719	0.984412	0.829037	protein phosphatase methylesterase 1 [Source:HGNC Symbol;Acc:HGNC:30178]	46	94	0.548168	0.863122	0.270734	0.337773
MBTPS2	-4249.35	0.0163228	0.984412	0.850618	membrane bound transcription factor peptidase; site 2 [Source:HGNC Symbol;Acc:HGNC:15455]	42	60	-0.0526467	0.564487	0.261037	0.541821
GOSR1	-4198.42	0.0164582	0.984412	0.738472	golgi SNAP receptor complex member 1 [Source:HGNC Symbol;Acc:HGNC:4430]	49	61	0.54964	0.0198835	0.0824785	0.640843
IFI16	3921.24	0.0167407	0.984412	0.859462	interferon gamma inducible protein 16 [Source:HGNC Symbol;Acc:HGNC:5395]	159	16	0.155954	0.0352435	0.884318	0.0383043
TNK2	3790.45	0.0169654	0.984412	0.81231	tyrosine kinase non receptor 2 [Source:HGNC Symbol;Acc:HGNC:19297]	62	42	0.342107	0.486935	0.0129296	0.176354
PHTF2	-4356.7	0.0173287	0.984412	0.862524	putative homeodomain transcription factor 2 [Source:HGNC Symbol;Acc:HGNC:13411]	160	16	0.349144	0.512162	0.863082	0.489665
SYNJ2BP	4929.27	0.0174856	0.984412	0.817709	synaptojanin 2 binding protein [Source:HGNC Symbol;Acc:HGNC:18955]	36	91	0.355027	0.819315	0.695131	0.798705
TULP3	-4391.58	0.0175183	0.984412	0.820869	tubby like protein 3 [Source:HGNC Symbol;Acc:HGNC:12425]	63	42	0.335257	0.414623	0.312895	0.245042
ECM1	3602.18	0.0175741	0.984412	0.911744	extracellular matrix protein 1 [Source:HGNC Symbol;Acc:HGNC:3153]	160	13	0.154313	0.967319	0.830966	0.914005
PSMB3	3771.39	0.0176157	0.984412	0.780481	proteasome subunit beta 3 [Source:HGNC Symbol;Acc:HGNC:9540]	52	53	0.387351	0.100318	0.0526477	0.834307
HOMER3	-4085.66	0.0180925	0.984412	0.852083	homer scaffold protein 3 [Source:HGNC Symbol;Acc:HGNC:17514]	52	59	0.228656	0.414455	0.345527	0.904472
NICN1	4558.32	0.0181652	0.984412	0.802636	nicolin 1 [Source:HGNC Symbol;Acc:HGNC:18317]	54	57	0.320945	0.08225	0.0316384	0.752826
VDAC3	-4013.37	0.0183242	0.984412	0.762547	voltage dependent anion channel 3 [Source:HGNC Symbol;Acc:HGNC:12674]	93	50	0.596796	0.593219	0.494967	0.916446
TMEM98	-5077.84	0.01883	0.984412	0.883189	transmembrane protein 98 [Source:HGNC Symbol;Acc:HGNC:24529]	54	56	0.27918	0.0483369	0.0147439	0.826947
PMPCB	3594.65	0.0193211	0.984412	0.787881	peptidase; mitochondrial processing beta subunit [Source:HGNC Symbol;Acc:HGNC:9119]	162	17	0.55637	0.513693	0.589162	0.857723
ADIPOR2	3539.78	0.0196158	0.984412	0.77304	adiponectin receptor 2 [Source:HGNC Symbol;Acc:HGNC:24041]	61	44	0.370833	0.553595	0.31134	0.332086
CDC37	-4206.77	0.0199666	0.984412	0.701791	cell division cycle 37 [Source:HGNC Symbol;Acc:HGNC:1735]	48	62	0.32369	0.512773	0.727204	0.814186
ZNF207	4183.21	0.0206983	0.984412	0.646777	zinc finger protein 207 [Source:HGNC Symbol;Acc:HGNC:12998]	53	57	0.335099	0.0323595	0.0219576	0.976231
PIK3R2	-3893.99	0.0209898	0.984412	0.760082	phosphoinositide-3-kinase regulatory subunit 2 [Source:HGNC Symbol;Acc:HGNC:8980]	50	60	0.218086	0.334513	0.44132	0.905064
BUD31	3975.69	0.0211664	0.984412	0.743431	BUD31 homolog [Source:HGNC Symbol;Acc:HGNC:29629]	161	14	0.577164	0.374054	0.619064	0.463907
ZNF394	-3766.62	0.0213882	0.984412	0.697436	zinc finger protein 394 [Source:HGNC Symbol;Acc:HGNC:18832]	161	16	0.486621	0.39413	0.618689	0.505639
MRPL30	4434.76	0.0216069	0.984412	0.694762	mitochondrial ribosomal protein L30 [Source:HGNC Symbol;Acc:HGNC:14036]	58	32	0.340689	0.818349	0.276145	0.57841
BLOC1S1	3863.38	0.0218959	0.984412	0.818593	biogenesis of lysosomal organelles complex 1 subunit 1 [Source:HGNC Symbol;Acc:HGNC:4200]	40	54	0.317157	0.193927	0.348691	0.121479
SLC30A5	-3754.43	0.0221201	0.984412	0.772856	solute carrier family 30 member 5 [Source:HGNC Symbol;Acc:HGNC:19089]	42	82	0.513769	0.752251	0.950087	0.788312
PFDN5	-4319.03	0.022512	0.984412	0.722262	prefoldin subunit 5 [Source:HGNC Symbol;Acc:HGNC:8869]	33	61	0.347961	0.770602	0.322947	0.403635
HCG11	-3734.1	0.0238149	0.984412	0.871562	HLA complex group 11 (non-protein coding) [Source:HGNC Symbol;Acc:HGNC:17707]	153	23	0.332385	0.149272	0.0216415	0.953949
CNOT3	5686.22	0.0241152	0.984412	0.61323	CCR4-NOT transcription complex subunit 3 [Source:HGNC Symbol;Acc:HGNC:7879]	46	63	0.283155	0.481328	0.457483	0.228087
CDC45	-3776.75	0.0249369	0.984412	0.793743	cell division cycle 45 [Source:HGNC Symbol;Acc:HGNC:1739]	108	25	0.373074	0.0828127	0.824464	0.124466
ZMAT5	-5211.35	0.0262519	0.984412	0.712249	zinc finger matrin-type 5 [Source:HGNC Symbol;Acc:HGNC:28046]	103	31	0.472231	0.231707	0.917007	0.246538
ERP29	-4207.9	0.0263887	0.984412	0.666114	endoplasmic reticulum protein 29 [Source:HGNC Symbol;Acc:HGNC:13799]	30	68	0.407682	0.618911	0.253182	0.280161
MAP3K12	-3631.7	0.0269572	0.984412	0.722687	mitogen-activated protein kinase kinase kinase 12 [Source:HGNC Symbol;Acc:HGNC:6851]	34	61	0.260764	0.754606	0.384231	0.449111
ATG4C	3907.74	0.0270667	0.984412	0.745957	autophagy related 4C cysteine peptidase [Source:HGNC Symbol;Acc:HGNC:16040]	60	53	0.360841	0.772961	0.781265	0.494109
RAB6A	-3603.49	0.02711	0.984412	0.717712	RAB6A; member RAS oncogene family [Source:HGNC Symbol;Acc:HGNC:9786]	47	91	0.626419	0.97025	0.352021	0.364251
ZNF780B	4252.3	0.027652	0.984412	0.78526	zinc finger protein 780B [Source:HGNC Symbol;Acc:HGNC:33109]	45	59	0.301715	0.443753	0.164194	0.0726456
ARPC4	-4109.67	0.0281039	0.984412	0.575645	actin related protein 2/3 complex subunit 4 [Source:HGNC Symbol;Acc:HGNC:707]	56	52	0.474682	0.101863	0.193625	0.675033
INTS3	3939.71	0.0281106	0.984412	0.67348	integrator complex subunit 3 [Source:HGNC Symbol;Acc:HGNC:26153]	164	11	0.532586	0.218706	0.758986	0.344599
RNF208	-3931.93	0.0285411	0.984412	0.833381	ring finger protein 208 [Source:HGNC Symbol;Acc:HGNC:25420]	25	129	0.144453	0.182561	0.377777	0.0962844
A4GALT	4158.09	0.0288437	0.984412	0.839269	alpha 1;4-galactosyltransferase (P blood group) [Source:HGNC Symbol;Acc:HGNC:18149]	117	19	-0.00920046	0.397404	0.891146	0.49684
WBP4	-4406.96	0.0315098	0.984412	0.713701	WW domain binding protein 4 [Source:HGNC Symbol;Acc:HGNC:12739]	71	70	0.527222	0.781743	0.175119	0.181229
CPNE3	-4781.15	0.0317198	0.984412	0.706482	copine 3 [Source:HGNC Symbol;Acc:HGNC:2316]	138	20	0.403779	0.711036	0.675909	0.96371
HSPA8	-4898.01	0.0318291	0.984412	0.645989	heat shock protein family A (Hsp70) member 8 [Source:HGNC Symbol;Acc:HGNC:5241]	17	157	0.252542	0.603409	0.37149	0.315084
TMEM115	3862.7	0.0319127	0.984412	0.593958	transmembrane protein 115 [Source:HGNC Symbol;Acc:HGNC:30055]	54	58	0.376588	0.0919753	0.016079	0.553009
SMOX	3966.67	0.0319225	0.984412	0.764482	spermine oxidase [Source:HGNC Symbol;Acc:HGNC:15862]	112	23	0.462687	0.999745	0.969141	0.976104
LRRC58	3833.52	0.0322686	0.984412	0.714356	leucine rich repeat containing 58 [Source:HGNC Symbol;Acc:HGNC:26968]	57	45	0.277009	0.970632	0.0244488	0.0676985
TNFRSF1A	5018.6	0.0325773	0.984412	0.625739	TNF receptor superfamily member 1A [Source:HGNC Symbol;Acc:HGNC:11916]	62	42	0.328643	0.530202	0.344541	0.333512
XRRA1	4695.4	0.0336066	0.984412	0.66678	X-ray radiation resistance associated 1 [Source:HGNC Symbol;Acc:HGNC:18868]	45	93	0.508963	0.900325	0.307268	0.266257
RNF141	3694.52	0.0336067	0.984412	0.625599	ring finger protein 141 [Source:HGNC Symbol;Acc:HGNC:21159]	36	90	0.467701	0.408924	0.399916	0.45303
CASKIN1	3628.87	0.0339525	0.984412	0.874468	CASK interacting protein 1 [Source:HGNC Symbol;Acc:HGNC:20879]	52	55	0.155139	0.940386	0.338544	0.560174
RFX5	4134.21	0.034577	0.984412	0.613209	regulatory factor X5 [Source:HGNC Symbol;Acc:HGNC:9986]	162	11	0.160882	0.216425	0.751971	0.351081
ZFP82	4514.51	0.0355506	0.984412	0.736171	ZFP82 zinc finger protein [Source:HGNC Symbol;Acc:HGNC:28682]	43	56	0.136405	0.649779	0.614814	0.435258
POLR2H	-4020.59	0.0358315	0.984412	0.54115	RNA polymerase II subunit H [Source:HGNC Symbol;Acc:HGNC:9195]	63	42	0.419986	0.252848	0.0177947	0.425993
SPSB3	-3758.94	0.0364683	0.984412	0.581397	splA/ryanodine receptor domain and SOCS box containing 3 [Source:HGNC Symbol;Acc:HGNC:30629]	51	57	0.321275	0.982879	0.262678	0.510987
SIVA1	4292.62	0.036532	0.984412	0.592995	SIVA1 apoptosis inducing factor [Source:HGNC Symbol;Acc:HGNC:17712]	40	90	0.461133	0.39472	0.980344	0.497428
TWF2	3858.83	0.0369392	0.984412	0.558153	twinfilin actin binding protein 2 [Source:HGNC Symbol;Acc:HGNC:9621]	53	58	0.284985	0.13717	0.0187497	0.463326
TSG101	-3795.71	0.0369935	0.963185	0.481957	tumor susceptibility 101 [Source:HGNC Symbol;Acc:HGNC:15971]	36	88	0.566961	0.541289	0.483545	0.470672
DDX11	4088.58	0.0382243	0.984412	0.625202	DEAD/H-box helicase 11 [Source:HGNC Symbol;Acc:HGNC:2736]	66	38	0.343254	0.530674	0.262352	0.304251
RAB13	-3559.45	0.0395478	0.984412	0.564887	RAB13; member RAS oncogene family [Source:HGNC Symbol;Acc:HGNC:9762]	164	11	0.44063	0.218706	0.758986	0.344599
ZNF548	-3753.02	0.0403012	0.984412	0.579391	zinc finger protein 548 [Source:HGNC Symbol;Acc:HGNC:26561]	45	65	0.328245	0.767427	0.28048	0.239559
SHANK1	4452.13	0.0416848	0.984412	0.863654	SH3 and multiple ankyrin repeat domains 1 [Source:HGNC Symbol;Acc:HGNC:15474]	45	64	0.0697385	0.558914	0.53395	0.30075
DHX32	3656.24	0.0417631	0.980894	0.520283	DEAH-box helicase 32 (putative) [Source:HGNC Symbol;Acc:HGNC:16717]	5	184	0.351037	0.136484	0.167051	0.0708182
RILP	-3867.84	0.0419282	0.984412	0.642488	Rab interacting lysosomal protein [Source:HGNC Symbol;Acc:HGNC:30266]	33	100	0.293756	0.0418592	0.0230452	0.479447
POLR2K	3593.98	0.0422533	0.984412	0.541814	RNA polymerase II subunit K [Source:HGNC Symbol;Acc:HGNC:9198]	140	21	0.540102	0.995054	0.453292	0.701859
TYR	-3973.36	0.0423767	0.984412	0.832324	tyrosinase [Source:HGNC Symbol;Acc:HGNC:12442]	31	121	0.131785	0.659823	0.873801	0.839572
CHAC2	-3684.35	0.0440836	0.984412	0.66741	ChaC cation transport regulator homolog 2 [Source:HGNC Symbol;Acc:HGNC:32363]	58	32	0.165937	0.592089	0.477751	0.923275
ZNF132	-3937.45	0.044258	0.984412	0.657644	zinc finger protein 132 [Source:HGNC Symbol;Acc:HGNC:12916]	45	65	0.147521	0.732314	0.335823	0.257304
GALK1	3928.21	0.0444267	0.984412	0.613091	galactokinase 1 [Source:HGNC Symbol;Acc:HGNC:4118]	106	31	0.350467	0.406395	0.0168452	0.421213
PROS1	4069.95	0.0448739	0.984412	0.722476	protein S [Source:HGNC Symbol;Acc:HGNC:9456]	68	37	0.103944	0.319492	0.14992	0.900618
POU3F3	4135.18	0.0454582	0.984412	0.866373	POU class 3 homeobox 3 [Source:HGNC Symbol;Acc:HGNC:9216]	57	34	-0.102243	0.998546	0.238507	0.382065
WNK1	4110.56	0.0455484	0.963185	0.48556	WNK lysine deficient protein kinase 1 [Source:HGNC Symbol;Acc:HGNC:14540]	62	44	0.377297	0.342939	0.42239	0.236961
GNA12	5591.5	0.0456981	0.963185	0.452563	G protein subunit alpha 12 [Source:HGNC Symbol;Acc:HGNC:4380]	166	14	0.410051	0.816713	0.210527	0.540913
NDUFB8	-4625.08	0.0459893	0.975091	0.506619	NADH:ubiquinone oxidoreductase subunit B8 [Source:HGNC Symbol;Acc:HGNC:7703]	3	182	0.398636	0.10253	0.352666	0.218677
DRG2	-3957.84	0.0474414	0.963185	0.402331	developmentally regulated GTP binding protein 2 [Source:HGNC Symbol;Acc:HGNC:3030]	36	97	0.549975	0.0368746	0.0045072	0.329119
CDK12	-3581.77	0.047603	0.963185	0.468112	cyclin dependent kinase 12 [Source:HGNC Symbol;Acc:HGNC:24224]	54	53	0.36347	0.0660116	0.0323013	0.851926
GNG10	3578.91	0.0492692	0.980894	0.51584	G protein subunit gamma 10 [Source:HGNC Symbol;Acc:HGNC:4402]	22	131	0.348138	0.5106	0.632378	0.384657
YWHAH	4076	0.0492944	0.963185	0.418324	tyrosine 3-monooxygenase/tryptophan 5-monooxygenase activation protein eta [Source:HGNC Symbol;Acc:HGNC:12853]	104	26	0.330487	0.197266	0.889465	0.190642
RNF103	4494.29	0.0493651	0.963185	0.431532	ring finger protein 103 [Source:HGNC Symbol;Acc:HGNC:12859]	56	34	0.283789	0.987044	0.208754	0.377915
SEPSECS	-3958.33	0.0504446	0.984412	0.574563	Sep (O-phosphoserine) tRNA:Sec (selenocysteine) tRNA synthase [Source:HGNC Symbol;Acc:HGNC:30605]	47	55	0.344949	0.339494	0.844637	0.358675
RNF7	-4325	0.0506826	0.949649	0.376368	ring finger protein 7 [Source:HGNC Symbol;Acc:HGNC:10070]	57	50	0.50666	0.764224	0.0395953	0.149941
KDM6A	4221.62	0.0522644	0.984412	0.538127	lysine demethylase 6A [Source:HGNC Symbol;Acc:HGNC:12637]	39	61	-0.0292657	0.561019	0.189029	0.440615
TM9SF1	5834.38	0.0526478	0.949649	0.369465	transmembrane 9 superfamily member 1 [Source:HGNC Symbol;Acc:HGNC:11864]	38	89	0.596347	0.665081	0.676315	0.611397
CYP2E1	-5471.6	0.0537919	0.984412	0.805777	cytochrome P450 family 2 subfamily E member 1 [Source:HGNC Symbol;Acc:HGNC:2631]	4	185	0.0778382	0.205048	0.0641968	0.0225121
CYB5D1	3874.47	0.053942	0.963185	0.436383	cytochrome b5 domain containing 1 [Source:HGNC Symbol;Acc:HGNC:26516]	32	103	0.483592	0.0833536	0.021878	0.491963
SEC16B	4274.73	0.0548145	0.984412	0.631709	SEC16 homolog B; endoplasmic reticulum export factor [Source:HGNC Symbol;Acc:HGNC:30301]	160	20	0.170791	0.050805	0.536853	0.0302814
TAX1BP3	5437.97	0.0560915	0.965262	0.489787	Tax1 binding protein 3 [Source:HGNC Symbol;Acc:HGNC:30684]	35	98	0.39854	0.0261959	0.00512948	0.334806
UBR3	3654.44	0.0562124	0.963185	0.484348	ubiquitin protein ligase E3 component n-recognin 3 (putative) [Source:HGNC Symbol;Acc:HGNC:30467]	60	39	0.29577	0.961046	0.185379	0.389352
ROPN1B	-3862.42	0.0565473	0.984412	0.686221	rhophilin associated tail protein 1B [Source:HGNC Symbol;Acc:HGNC:31927]	55	48	0.155265	0.7553	0.0132703	0.0569223
GABARAPL2	5010.56	0.0565483	0.949649	0.34056	GABA type A receptor associated protein like 2 [Source:HGNC Symbol;Acc:HGNC:13291]	34	92	0.585196	0.366064	0.408644	0.937831
SNX13	3730.83	0.0567472	0.984412	0.562677	sorting nexin 13 [Source:HGNC Symbol;Acc:HGNC:21335]	168	11	0.418711	0.349314	0.301424	0.116698
BPNT1	-3776.09	0.0567883	0.963185	0.468978	3'(2'); 5'-bisphosphate nucleotidase 1 [Source:HGNC Symbol;Acc:HGNC:1096]	151	18	0.493634	0.931451	0.402324	0.763817
POLR3F	3579.16	0.0579915	0.963185	0.426103	RNA polymerase III subunit F [Source:HGNC Symbol;Acc:HGNC:15763]	111	21	0.518316	0.959994	0.428098	0.69
OSGIN2	3725.16	0.0589285	0.963185	0.448443	oxidative stress induced growth inhibitor family member 2 [Source:HGNC Symbol;Acc:HGNC:1355]	136	21	0.24779	0.447804	0.605847	0.75057
SNX8	-3931.24	0.059364	0.984412	0.557289	sorting nexin 8 [Source:HGNC Symbol;Acc:HGNC:14972]	164	15	0.0843364	0.964595	0.142106	0.307688
DNAJB6	4006.52	0.059755	0.949649	0.373767	DnaJ heat shock protein family (Hsp40) member B6 [Source:HGNC Symbol;Acc:HGNC:14888]	171	19	0.577939	0.883748	0.592849	0.632898
ATL2	-3664.67	0.059776	0.963185	0.464308	atlastin GTPase 2 [Source:HGNC Symbol;Acc:HGNC:24047]	61	32	0.399056	0.815251	0.656172	0.991177
TBC1D1	-3849.51	0.0604886	0.963185	0.434481	TBC1 domain family member 1 [Source:HGNC Symbol;Acc:HGNC:11578]	50	50	0.246279	0.441306	0.662667	0.788568
STRADB	3585.43	0.0617042	0.967025	0.494928	STE20-related kinase adaptor beta [Source:HGNC Symbol;Acc:HGNC:13205]	59	43	0.127513	0.614367	0.319321	0.789036
TSEN15	3557.07	0.0622921	0.949649	0.346789	tRNA splicing endonuclease subunit 15 [Source:HGNC Symbol;Acc:HGNC:16791]	158	21	0.498561	0.301925	0.414299	0.122905
USP15	3785.65	0.0624971	0.963185	0.48183	ubiquitin specific peptidase 15 [Source:HGNC Symbol;Acc:HGNC:12613]	39	54	0.264077	0.292175	0.241043	0.11966
TCF4	-3553.63	0.0629544	0.984412	0.721149	transcription factor 4 [Source:HGNC Symbol;Acc:HGNC:11634]	39	80	0.0370014	0.517175	0.82952	0.62624
SHE	-3726.05	0.0639751	0.984412	0.676641	Src homology 2 domain containing E [Source:HGNC Symbol;Acc:HGNC:27004]	164	11	0.00489963	0.218706	0.758986	0.344599
IER5L	-5302.38	0.0643587	0.984412	0.564818	immediate early response 5 like [Source:HGNC Symbol;Acc:HGNC:23679]	22	131	0.230279	0.214586	0.672736	0.260373
PARL	3660.16	0.0653337	0.927718	0.279691	presenilin associated rhomboid like [Source:HGNC Symbol;Acc:HGNC:18253]	64	42	0.441989	0.2679	0.0162133	0.398613
STARD13	3575	0.0660228	0.984412	0.630848	StAR related lipid transfer domain containing 13 [Source:HGNC Symbol;Acc:HGNC:19164]	77	64	0.254052	0.869885	0.227304	0.250021
POPDC2	3638.23	0.0666368	0.984412	0.567257	popeye domain containing 2 [Source:HGNC Symbol;Acc:HGNC:17648]	57	45	0.108637	0.970632	0.0244488	0.0676985
GPR160	3547.03	0.0668667	0.984412	0.635836	G protein-coupled receptor 160 [Source:HGNC Symbol;Acc:HGNC:23693]	64	43	0.0953081	0.424653	0.0278365	0.346257
DCDC2	3673.28	0.0670961	0.984412	0.739655	doublecortin domain containing 2 [Source:HGNC Symbol;Acc:HGNC:18141]	157	21	0.14649	0.206603	0.0809412	0.759376
KIAA0895	3764.8	0.0673328	0.984412	0.591349	KIAA0895 [Source:HGNC Symbol;Acc:HGNC:22206]	164	17	0.391514	0.0230433	0.596365	0.00754594
PIM3	-3806.44	0.0679265	0.963185	0.416281	Pim-3 proto-oncogene; serine/threonine kinase [Source:HGNC Symbol;Acc:HGNC:19310]	110	29	0.358703	0.691082	0.813318	0.963054
NUMB	-4212.02	0.0679321	0.927318	0.268653	NUMB; endocytic adaptor protein [Source:HGNC Symbol;Acc:HGNC:8060]	36	94	0.511858	0.776316	0.869837	0.909161
ZNF71	3621.9	0.0684097	0.963185	0.449981	zinc finger protein 71 [Source:HGNC Symbol;Acc:HGNC:13141]	47	64	0.219524	0.717124	0.143988	0.1329
ITGA6	4340.37	0.0685467	0.984412	0.638762	integrin subunit alpha 6 [Source:HGNC Symbol;Acc:HGNC:6142]	60	39	0.215953	0.961046	0.185379	0.389352
DNAJC14	4171.26	0.0689047	0.836138	0.123974	DnaJ heat shock protein family (Hsp40) member C14 [Source:HGNC Symbol;Acc:HGNC:24581]	39	55	0.487593	0.259653	0.457088	0.212334
TIMM8B	3747.59	0.069369	0.949649	0.332307	translocase of inner mitochondrial membrane 8 homolog B [Source:HGNC Symbol;Acc:HGNC:11818]	16	161	0.411719	0.780427	0.276502	0.267687
ZNF347	3740.52	0.0705558	0.984412	0.618268	zinc finger protein 347 [Source:HGNC Symbol;Acc:HGNC:16447]	47	63	0.114387	0.501103	0.374706	0.190431
PITPNB	3962.7	0.0705617	0.949649	0.292711	phosphatidylinositol transfer protein beta [Source:HGNC Symbol;Acc:HGNC:9002]	99	33	0.573813	0.188396	0.597089	0.117883
NINL	-3912.19	0.0707169	0.984412	0.59078	ninein like [Source:HGNC Symbol;Acc:HGNC:29163]	114	20	0.24019	0.557227	0.28826	0.235529
XYLT2	3556.82	0.0711853	0.927318	0.276295	xylosyltransferase 2 [Source:HGNC Symbol;Acc:HGNC:15517]	83	38	0.468258	0.355752	0.0014619	0.181039
FAM161A	3602.88	0.0716101	0.967025	0.495406	FAM161A; centrosomal protein [Source:HGNC Symbol;Acc:HGNC:25808]	59	31	0.104692	0.620499	0.62335	0.838533
CS	-3731.56	0.0719792	0.921218	0.217134	citrate synthase [Source:HGNC Symbol;Acc:HGNC:2422]	40	55	0.473307	0.286539	0.287528	0.142672
B3GNT2	3537.71	0.072751	0.963185	0.407576	UDP-GlcNAc:betaGal beta-1;3-N-acetylglucosaminyltransferase 2 [Source:HGNC Symbol;Acc:HGNC:15629]	59	31	0.151864	0.620499	0.62335	0.838533
SKIV2L	3539.1	0.0729227	0.927318	0.249999	Ski2 like RNA helicase [Source:HGNC Symbol;Acc:HGNC:10898]	151	23	0.531693	0.0521096	0.0491631	0.380679
RECQL	-3935.37	0.0738443	0.963185	0.451235	RecQ like helicase [Source:HGNC Symbol;Acc:HGNC:9948]	66	38	0.28981	0.383233	0.298488	0.211843
ANO9	-4710.63	0.0749754	0.984412	0.744995	anoctamin 9 [Source:HGNC Symbol;Acc:HGNC:20679]	35	89	0.0679268	0.468066	0.653382	0.666471
SLITRK2	-4226.23	0.0749795	0.984412	0.705211	SLIT and NTRK like family member 2 [Source:HGNC Symbol;Acc:HGNC:13449]	43	59	0.11988	0.914007	0.66804	0.791391
UTP20	4115.83	0.0765996	0.949649	0.319761	UTP20; small subunit processome component [Source:HGNC Symbol;Acc:HGNC:17897]	25	69	0.339244	0.755295	0.131488	0.193287
MED15	3709.66	0.0778675	0.949649	0.348156	mediator complex subunit 15 [Source:HGNC Symbol;Acc:HGNC:14248]	108	25	0.376549	0.0828127	0.824464	0.124466
FABP3	3689.33	0.0781375	0.984412	0.616382	fatty acid binding protein 3 [Source:HGNC Symbol;Acc:HGNC:3557]	65	49	0.227	0.879872	0.832994	0.635205
PITPNM2	4643.62	0.0789565	0.963185	0.411192	phosphatidylinositol transfer protein membrane associated 2 [Source:HGNC Symbol;Acc:HGNC:21044]	32	65	0.259912	0.523218	0.159353	0.156231
NHLRC2	-4407.03	0.0791798	0.963185	0.444982	NHL repeat containing 2 [Source:HGNC Symbol;Acc:HGNC:24731]	4	182	0.264313	0.144636	0.0640341	0.0220571
KCTD9	-4257.46	0.0795287	0.963185	0.391607	potassium channel tetramerization domain containing 9 [Source:HGNC Symbol;Acc:HGNC:22401]	81	74	0.377667	0.70259	0.707653	0.79787
YEATS4	3825.38	0.0798551	0.963185	0.443808	YEATS domain containing 4 [Source:HGNC Symbol;Acc:HGNC:24859]	48	46	0.380053	0.203203	0.268342	0.0912254
SLC25A32	4033.35	0.0800774	0.927318	0.269459	solute carrier family 25 member 32 [Source:HGNC Symbol;Acc:HGNC:29683]	142	21	0.555226	0.859461	0.45613	0.586633
RALGPS2	-4069.89	0.0802762	0.964401	0.487761	Ral GEF with PH domain and SH3 binding motif 2 [Source:HGNC Symbol;Acc:HGNC:30279]	159	21	0.199241	0.333188	0.621764	0.117713
GFM1	-3552.44	0.0810243	0.927318	0.239993	G elongation factor mitochondrial 1 [Source:HGNC Symbol;Acc:HGNC:13780]	59	47	0.437483	0.286788	0.0196289	0.325051
CTHRC1	4902.28	0.0810718	0.984412	0.578129	collagen triple helix repeat containing 1 [Source:HGNC Symbol;Acc:HGNC:18831]	142	21	0.196115	0.859461	0.45613	0.586633
MRPL43	4766.66	0.0811224	0.860374	0.162018	mitochondrial ribosomal protein L43 [Source:HGNC Symbol;Acc:HGNC:14517]	3	182	0.531602	0.10253	0.352666	0.218677
ABCB5	-5423.13	0.0826646	0.984412	0.755448	ATP binding cassette subfamily B member 5 [Source:HGNC Symbol;Acc:HGNC:46]	165	14	-0.0968752	0.216739	0.424042	0.0668339
USP6NL	3754.3	0.0835251	0.949649	0.326528	USP6 N-terminal like [Source:HGNC Symbol;Acc:HGNC:16858]	16	149	0.35774	0.783309	0.281788	0.446032
KAT2A	-3949.45	0.0841719	0.927318	0.277598	lysine acetyltransferase 2A [Source:HGNC Symbol;Acc:HGNC:4201]	55	49	0.284391	0.129532	0.0315708	0.700695
ADD2	3912.25	0.0845924	0.984412	0.721142	adducin 2 [Source:HGNC Symbol;Acc:HGNC:244]	56	31	0.0938927	0.54868	0.316923	0.908586
INO80B	-3724.47	0.0848815	0.949649	0.297451	INO80 complex subunit B [Source:HGNC Symbol;Acc:HGNC:13324]	56	33	0.218153	0.907872	0.360698	0.617604
ARMC9	3847	0.0910467	0.949649	0.326638	armadillo repeat containing 9 [Source:HGNC Symbol;Acc:HGNC:20730]	57	53	0.16488	0.697802	0.577302	0.571568
ATP6V1D	-4618.32	0.092059	0.837028	0.142814	ATPase H+ transporting V1 subunit D [Source:HGNC Symbol;Acc:HGNC:13527]	39	93	0.550272	0.620624	0.748583	0.684422
PDS5B	3761.85	0.092212	0.949649	0.349361	PDS5 cohesin associated factor B [Source:HGNC Symbol;Acc:HGNC:20418]	76	63	0.47349	0.901655	0.269974	0.317788
AIDA	-3957.54	0.0939351	0.837028	0.136878	axin interactor; dorsalization associated [Source:HGNC Symbol;Acc:HGNC:25761]	150	20	0.419784	0.961478	0.451573	0.679302
NDUFAF3	-3600.26	0.0951535	0.927318	0.242258	NADH:ubiquinone oxidoreductase complex assembly factor 3 [Source:HGNC Symbol;Acc:HGNC:29918]	52	58	0.30404	0.0755324	0.0219572	0.660194
CYB561D2	-3863.4	0.0955633	0.837028	0.133761	cytochrome b561 family member D2 [Source:HGNC Symbol;Acc:HGNC:30253]	54	58	0.340468	0.0919753	0.016079	0.553009
ITM2B	-4652.64	0.0956656	0.927318	0.271602	integral membrane protein 2B [Source:HGNC Symbol;Acc:HGNC:6174]	70	73	0.349715	0.500471	0.228566	0.10914
LNX2	-4687.29	0.0959454	0.949649	0.34803	ligand of numb-protein X 2 [Source:HGNC Symbol;Acc:HGNC:20421]	73	63	0.399639	0.683778	0.287349	0.585957
PNPO	3649.71	0.0968717	0.837028	0.132745	pyridoxamine 5'-phosphate oxidase [Source:HGNC Symbol;Acc:HGNC:30260]	74	44	0.339404	0.443705	0.00218898	0.148813
RGS10	-4173.44	0.0969518	0.963185	0.392795	regulator of G protein signaling 10 [Source:HGNC Symbol;Acc:HGNC:9992]	5	184	0.384998	0.171585	0.0481686	0.0102545
ZFP30	4775.73	0.0978511	0.963185	0.45522	ZFP30 zinc finger protein [Source:HGNC Symbol;Acc:HGNC:29555]	43	58	0.156998	0.563891	0.634063	0.389478
MRPS11	-3788.46	0.101335	0.751565	0.0870703	mitochondrial ribosomal protein S11 [Source:HGNC Symbol;Acc:HGNC:14050]	93	29	0.447181	0.572422	0.590501	0.857978
KCNH2	-3611.13	0.104491	0.984412	0.709993	potassium voltage-gated channel subfamily H member 2 [Source:HGNC Symbol;Acc:HGNC:6251]	172	15	0.104751	0.833279	0.618988	0.907865
RORC	3809.1	0.10477	0.984412	0.682968	RAR related orphan receptor C [Source:HGNC Symbol;Acc:HGNC:10260]	160	11	-0.0119226	0.225238	0.790539	0.340912
CRISPLD2	-3721.93	0.104836	0.963185	0.460394	cysteine rich secretory protein LCCL domain containing 2 [Source:HGNC Symbol;Acc:HGNC:25248]	30	102	0.133792	0.0923709	0.408754	0.531839
SEC61A2	-3658.01	0.107146	0.909727	0.197831	Sec61 translocon alpha 2 subunit [Source:HGNC Symbol;Acc:HGNC:17702]	15	150	0.336633	0.788127	0.270185	0.414309
PLA2G4A	3571.02	0.109051	0.963185	0.472966	phospholipase A2 group IVA [Source:HGNC Symbol;Acc:HGNC:9035]	163	19	0.224026	0.195773	0.520044	0.120535
C6orf136	4889	0.109269	0.751565	0.0921695	chromosome 6 open reading frame 136 [Source:HGNC Symbol;Acc:HGNC:21301]	152	21	0.483949	0.207341	0.0864213	0.712687
TSPAN33	-3614.18	0.110664	0.949649	0.354023	tetraspanin 33 [Source:HGNC Symbol;Acc:HGNC:28743]	174	11	0.156491	0.781818	0.585455	0.746093
DLEU1	-3847.82	0.110901	0.872066	0.173741	deleted in lymphocytic leukemia 1 (non-protein coding) [Source:HGNC Symbol;Acc:HGNC:13747]	70	72	0.418316	0.569909	0.224572	0.137151
ATP6V0A4	-4065.06	0.113801	0.984412	0.655002	ATPase H+ transporting V0 subunit a4 [Source:HGNC Symbol;Acc:HGNC:866]	178	10	-0.0378267	0.794204	0.872749	0.669273
MIPEP	-3974.59	0.116338	0.751565	0.0909152	mitochondrial intermediate peptidase [Source:HGNC Symbol;Acc:HGNC:7104]	72	64	0.46565	0.472286	0.289175	0.775263
GPHN	3667.33	0.121233	0.860374	0.158949	gephyrin [Source:HGNC Symbol;Acc:HGNC:15465]	38	95	0.475279	0.896463	0.524034	0.6691
FURIN	4629.71	0.121748	0.837028	0.144844	furin; paired basic amino acid cleaving enzyme [Source:HGNC Symbol;Acc:HGNC:8568]	96	27	0.374205	0.676124	0.668458	0.842411
TSFM	-3740.63	0.122597	0.860374	0.153884	Ts translation elongation factor; mitochondrial [Source:HGNC Symbol;Acc:HGNC:12367]	48	53	0.585694	0.373393	0.122969	0.0925704
ABTB2	-4615.24	0.122664	0.927318	0.261739	ankyrin repeat and BTB domain containing 2 [Source:HGNC Symbol;Acc:HGNC:23842]	36	90	0.230456	0.551894	0.26462	0.340456
ZNF853	-4472.62	0.122842	0.963185	0.463672	zinc finger protein 853 [Source:HGNC Symbol;Acc:HGNC:21767]	169	11	0.155323	0.317894	0.379541	0.115466
HOXA13	-3629.13	0.124939	0.984412	0.544182	homeobox A13 [Source:HGNC Symbol;Acc:HGNC:5102]	167	14	0.268929	0.107831	0.461373	0.0342105
KLF10	4137.95	0.12672	0.837028	0.135495	Kruppel like factor 10 [Source:HGNC Symbol;Acc:HGNC:11810]	141	21	0.193477	0.984872	0.427672	0.694298
INTS6	-4727.03	0.126847	0.781013	0.104796	integrator complex subunit 6 [Source:HGNC Symbol;Acc:HGNC:14879]	71	69	0.468698	0.307076	0.279696	0.0699331
CCDC91	-3814.42	0.127515	0.872066	0.175247	coiled-coil domain containing 91 [Source:HGNC Symbol;Acc:HGNC:24855]	64	41	0.326729	0.863059	0.230514	0.486885
SDK2	4428.66	0.127642	0.984412	0.613417	sidekick cell adhesion molecule 2 [Source:HGNC Symbol;Acc:HGNC:19308]	104	32	0.0561005	0.261691	0.00935856	0.477779
EXT2	-3617.43	0.128562	0.671517	0.0645225	exostosin glycosyltransferase 2 [Source:HGNC Symbol;Acc:HGNC:3513]	34	92	0.457089	0.900782	0.43888	0.323757
MME	4805.55	0.129833	0.984412	0.612697	membrane metalloendopeptidase [Source:HGNC Symbol;Acc:HGNC:7154]	57	49	-0.0319562	0.385724	0.0210415	0.229175
FXYD1	4103.07	0.135106	0.984412	0.585285	FXYD domain containing ion transport regulator 1 [Source:HGNC Symbol;Acc:HGNC:4025]	45	60	0.0639484	0.749146	0.411987	0.333951
MINPP1	-3557.47	0.141112	0.837028	0.141042	multiple inositol-polyphosphate phosphatase 1 [Source:HGNC Symbol;Acc:HGNC:7102]	2	182	0.305827	0.251916	0.945234	0.670572
C3orf58	-3658.08	0.142143	0.837028	0.14185	chromosome 3 open reading frame 58 [Source:HGNC Symbol;Acc:HGNC:28490]	57	47	0.171323	0.393002	0.0291878	0.29734
SUSD2	5143.4	0.143313	0.949649	0.366135	sushi domain containing 2 [Source:HGNC Symbol;Acc:HGNC:30667]	101	26	0.0880428	0.136413	0.874381	0.137156
GLDN	-4329.98	0.143436	0.963185	0.451864	gliomedin [Source:HGNC Symbol;Acc:HGNC:29514]	63	62	-0.00125204	0.439228	0.989493	0.506374
HOXD3	3617.63	0.143625	0.949649	0.296145	homeobox D3 [Source:HGNC Symbol;Acc:HGNC:5137]	60	40	0.143532	0.946319	0.283213	0.500875
MICAL2	3805.7	0.144344	0.949649	0.340905	microtubule associated monooxygenase; calponin and LIM domain containing 2 [Source:HGNC Symbol;Acc:HGNC:24693]	37	90	0.173719	0.421563	0.447896	0.49782
FOXF2	-4160.16	0.145572	0.963185	0.476997	forkhead box F2 [Source:HGNC Symbol;Acc:HGNC:3810]	167	14	0.224379	0.923892	0.0979093	0.363335
CSE1L	5749.52	0.146896	0.536314	0.0467205	chromosome segregation 1 like [Source:HGNC Symbol;Acc:HGNC:2431]	145	3	0.469977	0.570555	0.951275	0.76425
NECAB3	3739.52	0.148693	0.818758	0.115372	N-terminal EF-hand calcium binding protein 3 [Source:HGNC Symbol;Acc:HGNC:15851]	137	5	0.287831	0.847479	0.94716	0.73599
CCDC140	4408.92	0.148908	0.876378	0.179029	coiled-coil domain containing 140 [Source:HGNC Symbol;Acc:HGNC:26514]	60	48	-0.0290965	0.466714	0.496763	0.26743
PANX2	-4947.27	0.150046	0.963185	0.451344	pannexin 2 [Source:HGNC Symbol;Acc:HGNC:8600]	110	29	0.112419	0.691082	0.813318	0.963054
OPHN1	4304.15	0.152481	0.927318	0.272028	oligophrenin 1 [Source:HGNC Symbol;Acc:HGNC:8148]	42	56	-0.123609	0.744811	0.117116	0.326
CLN5	-3887.94	0.157337	0.482055	0.0324227	CLN5; intracellular trafficking protein [Source:HGNC Symbol;Acc:HGNC:2076]	74	62	0.446646	0.270762	0.304701	0.0688604
IFI44L	3849.47	0.159103	0.963185	0.421282	interferon induced protein 44 like [Source:HGNC Symbol;Acc:HGNC:17817]	59	64	0.121168	0.841431	0.87484	0.764055
LOX	3648.92	0.161409	0.949649	0.327969	lysyl oxidase [Source:HGNC Symbol;Acc:HGNC:6664]	36	94	0.00715402	0.800359	0.489992	0.419445
DTWD1	-4307.12	0.16228	0.619817	0.0571824	DTW domain containing 1 [Source:HGNC Symbol;Acc:HGNC:30926]	60	64	0.384911	0.352111	0.860668	0.341154
ATP10A	-4527.67	0.168244	0.930967	0.282204	ATPase phospholipid transporting 10A (putative) [Source:HGNC Symbol;Acc:HGNC:13542]	64	55	0.110712	0.162333	0.811987	0.314681
HSPA1B	3609.28	0.168643	0.860374	0.161505	heat shock protein family A (Hsp70) member 1B [Source:HGNC Symbol;Acc:HGNC:5233]	151	23	0.291093	0.0521096	0.0491631	0.380679
RINL	-4027.13	0.169609	0.751565	0.0928623	Ras and Rab interactor like [Source:HGNC Symbol;Acc:HGNC:24795]	44	59	0.115588	0.3863	0.370429	0.148833
DUSP14	3757.92	0.170113	0.518536	0.0418587	dual specificity phosphatase 14 [Source:HGNC Symbol;Acc:HGNC:17007]	51	54	0.186823	0.037136	0.024725	0.923443
VANGL1	-4088.07	0.170204	0.671517	0.06773	VANGL planar cell polarity protein 1 [Source:HGNC Symbol;Acc:HGNC:15512]	72	58	0.280025	0.562422	0.486119	0.349985
FAM171A1	3762.95	0.17065	0.949649	0.351001	family with sequence similarity 171 member A1 [Source:HGNC Symbol;Acc:HGNC:23522]	16	148	-0.0400863	0.945252	0.165106	0.229011
FAM71E1	3966.76	0.172345	0.927318	0.229539	family with sequence similarity 71 member E1 [Source:HGNC Symbol;Acc:HGNC:25107]	45	64	0.242344	0.558914	0.53395	0.30075
LRRN2	3881.49	0.178627	0.963185	0.44928	leucine rich repeat neuronal 2 [Source:HGNC Symbol;Acc:HGNC:16914]	166	15	0.0542523	0.309322	0.0779821	0.0738543
PDZD2	-4969.19	0.189169	0.949649	0.375241	PDZ domain containing 2 [Source:HGNC Symbol;Acc:HGNC:18486]	77	56	0.169042	0.546213	0.750411	0.473325
HSPH1	3894.75	0.189791	0.536314	0.0468281	heat shock protein family H (Hsp110) member 1 [Source:HGNC Symbol;Acc:HGNC:16969]	78	61	0.422656	0.833871	0.270116	0.285194
NMNAT3	3622.41	0.191212	0.949649	0.348613	nicotinamide nucleotide adenylyltransferase 3 [Source:HGNC Symbol;Acc:HGNC:20989]	58	49	0.0501223	0.957662	0.0181742	0.0685427
STC2	3637.58	0.191639	0.927318	0.241797	stanniocalcin 2 [Source:HGNC Symbol;Acc:HGNC:11374]	34	89	-0.0106986	0.565602	0.438609	0.830825
COL8A2	-3688.93	0.192165	0.921218	0.207797	collagen type VIII alpha 2 chain [Source:HGNC Symbol;Acc:HGNC:2216]	61	47	0.0285203	0.62844	0.79746	0.677454
IGFBP7	3722.63	0.1942	0.837028	0.132364	insulin like growth factor binding protein 7 [Source:HGNC Symbol;Acc:HGNC:5476]	46	56	0.14975	0.879948	0.528677	0.705104
BICC1	-3680.53	0.194716	0.927318	0.268034	BicC family RNA binding protein 1 [Source:HGNC Symbol;Acc:HGNC:19351]	2	179	0.120763	0.357467	0.903125	0.697248
CKMT1B	-3830.21	0.19516	0.967025	0.495461	creatine kinase; mitochondrial 1B [Source:HGNC Symbol;Acc:HGNC:1995]	59	71	0.0434716	0.235481	0.976353	0.348443
KLF4	4631.25	0.197173	0.860374	0.161875	Kruppel like factor 4 [Source:HGNC Symbol;Acc:HGNC:6348]	22	132	0.0438902	0.510324	0.83219	0.539953
SLCO5A1	3736.76	0.198438	0.963185	0.405793	solute carrier organic anion transporter family member 5A1 [Source:HGNC Symbol;Acc:HGNC:19046]	136	20	-0.0548524	0.747471	0.799771	0.965942
HMGN5	3733.66	0.199257	0.837028	0.14617	high mobility group nucleosome binding domain 5 [Source:HGNC Symbol;Acc:HGNC:8013]	37	61	-0.105566	0.347104	0.401897	0.934264
TRPM1	-4570.39	0.201875	0.963185	0.450614	transient receptor potential cation channel subfamily M member 1 [Source:HGNC Symbol;Acc:HGNC:7146]	62	58	-0.00928684	0.308387	0.914507	0.438232
YAF2	-3766.2	0.202882	0.30915	0.0157885	YY1 associated factor 2 [Source:HGNC Symbol;Acc:HGNC:17363]	38	62	0.369853	0.163695	0.431482	0.105363
NOV	-3907.3	0.20927	0.949649	0.338705	nephroblastoma overexpressed [Source:HGNC Symbol;Acc:HGNC:7885]	146	20	-0.0190896	0.775976	0.58788	0.462992
TJP2	4512.27	0.21007	0.749102	0.0814509	tight junction protein 2 [Source:HGNC Symbol;Acc:HGNC:11828]	24	143	0.347879	0.22596	0.43663	0.119104
B3GNT7	-3594.03	0.21218	0.921218	0.211883	UDP-GlcNAc:betaGal beta-1;3-N-acetylglucosaminyltransferase 7 [Source:HGNC Symbol;Acc:HGNC:18811]	57	53	0.188045	0.697802	0.577302	0.571568
PLCH2	4401.17	0.215201	0.949649	0.321248	phospholipase C eta 2 [Source:HGNC Symbol;Acc:HGNC:29037]	58	58	0.164839	0.698837	0.133528	0.507203
HIST1H2BD	3564.86	0.215732	0.836138	0.122426	histone cluster 1 H2B family member d [Source:HGNC Symbol;Acc:HGNC:4747]	154	22	0.250498	0.108025	0.0248331	0.760646
FAM84B	4119.77	0.217148	0.927318	0.253028	family with sequence similarity 84 member B [Source:HGNC Symbol;Acc:HGNC:24166]	151	19	0.146922	0.922999	0.653492	0.632525
LLGL2	-5232.21	0.223553	0.767614	0.0961099	LLGL2; scribble cell polarity complex component [Source:HGNC Symbol;Acc:HGNC:6629]	107	30	0.239085	0.419035	0.0170062	0.417433
DUOX2	3755.08	0.226506	0.963185	0.406312	dual oxidase 2 [Source:HGNC Symbol;Acc:HGNC:13273]	60	69	-0.0201195	0.213777	0.965034	0.328973
ALDH1L1	4096.67	0.23307	0.963185	0.415583	aldehyde dehydrogenase 1 family member L1 [Source:HGNC Symbol;Acc:HGNC:3978]	55	49	-0.00015074	0.915562	0.0147169	0.0422631
PCDHB7	4014.33	0.239697	0.909727	0.199069	protocadherin beta 7 [Source:HGNC Symbol;Acc:HGNC:8692]	27	103	0.203079	0.300615	0.8772	0.532342
TEK	-3721.6	0.256357	0.769418	0.0988708	TEK receptor tyrosine kinase [Source:HGNC Symbol;Acc:HGNC:11724]	19	188	-0.0078325	0.596594	0.288733	0.133755
KLF2	3890.6	0.260392	0.518536	0.0380097	Kruppel like factor 2 [Source:HGNC Symbol;Acc:HGNC:6347]	50	59	0.0779225	0.5976	0.466018	0.859316
SLC35F2	3903.26	0.260772	0.781013	0.105508	solute carrier family 35 member F2 [Source:HGNC Symbol;Acc:HGNC:23615]	18	159	0.183786	0.749903	0.433576	0.411373
CHADL	-4065.07	0.275289	0.927318	0.225164	chondroadherin like [Source:HGNC Symbol;Acc:HGNC:25165]	121	18	0.238536	0.359086	0.790988	0.443714
PLAC9	-3567.47	0.276282	0.837028	0.134811	placenta specific 9 [Source:HGNC Symbol;Acc:HGNC:19255]	2	180	-0.018332	0.261228	0.940549	0.670484
FOLH1	-4032.53	0.283707	0.909727	0.197894	folate hydrolase 1 [Source:HGNC Symbol;Acc:HGNC:3788]	34	91	0.0364241	0.84975	0.659883	0.512954
GTF2H2B	-3984.31	0.284144	0.541838	0.0482031	general transcription factor IIH subunit 2B (pseudogene) [Source:HGNC Symbol;Acc:HGNC:31393]	42	82	0.168697	0.549406	0.985386	0.675457
ABCC9	4531.39	0.293841	0.740961	0.0793451	ATP binding cassette subfamily C member 9 [Source:HGNC Symbol;Acc:HGNC:60]	66	37	0.0123089	0.459881	0.280658	0.261071
PPP1R14A	-3943.56	0.300348	0.671517	0.0685899	protein phosphatase 1 regulatory inhibitor subunit 14A [Source:HGNC Symbol;Acc:HGNC:14871]	45	58	0.124769	0.408982	0.404936	0.176959
TNFRSF19	5144.8	0.328052	0.518536	0.0418418	TNF receptor superfamily member 19 [Source:HGNC Symbol;Acc:HGNC:11915]	72	64	0.200715	0.472286	0.289175	0.775263
TMEM26	3617.44	0.329823	0.528529	0.0444069	transmembrane protein 26 [Source:HGNC Symbol;Acc:HGNC:28550]	4	174	-0.113209	0.620678	0.792238	0.859913
HIST1H2BC	4372.89	0.337828	0.410953	0.0247596	histone cluster 1 H2B family member c [Source:HGNC Symbol;Acc:HGNC:4757]	153	23	-0.158072	0.149272	0.0216415	0.953949
TTC39A	-4552.83	0.343811	0.837028	0.133362	tetratricopeptide repeat domain 39A [Source:HGNC Symbol;Acc:HGNC:18657]	63	51	0.155778	0.618903	0.972574	0.453677
LPAR1	-6194.22	0.349427	0.769418	0.0979541	lysophosphatidic acid receptor 1 [Source:HGNC Symbol;Acc:HGNC:3166]	23	132	0.046089	0.435483	0.739448	0.426336
GAB2	-3755.11	0.36221	0.216518	0.00713403	GRB2 associated binding protein 2 [Source:HGNC Symbol;Acc:HGNC:14458]	45	94	0.457928	0.730906	0.40946	0.259229
SLC24A4	3904.85	0.37748	0.837028	0.140098	solute carrier family 24 member 4 [Source:HGNC Symbol;Acc:HGNC:10978]	40	91	0.16172	0.5741	0.999813	0.732953
DEPDC7	-4322.56	0.383063	0.286023	0.0122514	DEP domain containing 7 [Source:HGNC Symbol;Acc:HGNC:29899]	34	89	0.328362	0.527906	0.329733	0.414742
SH2D4A	-3659.37	0.431374	0.518536	0.0396425	SH2 domain containing 4A [Source:HGNC Symbol;Acc:HGNC:26102]	80	76	0.231075	0.868024	0.937848	0.712802
GSTT2	-3933.45	0.44306	0.300652	0.0138756	glutathione S-transferase theta 2 (gene/pseudogene) [Source:HGNC Symbol;Acc:HGNC:4642]	102	26	0.0721911	0.139097	0.853603	0.134652
FAM84A	4822.27	0.445981	0.528529	0.0442365	family with sequence similarity 84 member A [Source:HGNC Symbol;Acc:HGNC:20743]	58	40	0.108081	0.999535	0.461153	0.593888
MMP3	3872.42	0.45568	0.860374	0.16576	matrix metallopeptidase 3 [Source:HGNC Symbol;Acc:HGNC:7173]	30	133	0.0979299	0.814253	0.619572	0.526488
TIMD4	3679.96	0.47026	0.781162	0.106815	T cell immunoglobulin and mucin domain containing 4 [Source:HGNC Symbol;Acc:HGNC:25132]	28	99	0.0624146	0.277525	0.530316	0.930586
SSC5D	4411.97	0.480336	0.136626	0.00270101	scavenger receptor cysteine rich family member with 5 domains [Source:HGNC Symbol;Acc:HGNC:26641]	45	65	0.110567	0.805689	0.356459	0.324648
RDH5	3557.93	0.50356	0.202586	0.0062143	retinol dehydrogenase 5 [Source:HGNC Symbol;Acc:HGNC:9940]	40	54	0.0463095	0.193927	0.348691	0.121479
FOSB	3638.33	0.507657	0.232171	0.00803227	FosB proto-oncogene; AP-1 transcription factor subunit [Source:HGNC Symbol;Acc:HGNC:3797]	43	62	0.165491	0.71887	0.440582	0.313627
MECOM	3861.61	0.5085	0.0177909	0.000175857	MDS1 and EVI1 complex locus [Source:HGNC Symbol;Acc:HGNC:3498]	63	45	-0.0406968	0.519657	0.0171588	0.211559
PCLO	3715.86	0.517192	0.482055	0.032736	piccolo presynaptic cytomatrix protein [Source:HGNC Symbol;Acc:HGNC:13406]	159	13	0.0617172	0.184851	0.51279	0.280217
FUT2	-3876.36	0.569401	0.136626	0.00241878	fucosyltransferase 2 [Source:HGNC Symbol;Acc:HGNC:4013]	44	65	0.270402	0.489831	0.417946	0.20311
CASQ2	3621.38	0.601559	0.128361	0.00190322	calsequestrin 2 [Source:HGNC Symbol;Acc:HGNC:1513]	73	57	0.0519953	0.485501	0.438006	0.277644
ELOVL2	-4205.03	0.604555	0.202586	0.00634125	ELOVL fatty acid elongase 2 [Source:HGNC Symbol;Acc:HGNC:14416]	169	14	0.0462153	0.845298	0.0956982	0.334564
NTRK2	3771.28	0.610014	0.171272	0.00479676	neurotrophic receptor tyrosine kinase 2 [Source:HGNC Symbol;Acc:HGNC:8032]	21	137	0.0582915	0.280859	0.743874	0.30161
ELF3	-3872.21	0.616104	0.373689	0.0215472	E74 like ETS transcription factor 3 [Source:HGNC Symbol;Acc:HGNC:3318]	166	15	-0.0831526	0.324598	0.147343	0.114554
C6orf132	3537.25	0.626591	0.252156	0.0103854	chromosome 6 open reading frame 132 [Source:HGNC Symbol;Acc:HGNC:21288]	142	31	-0.0684805	0.13361	0.115393	0.593661
TMEM45B	-3815.61	0.765302	0.347127	0.0188557	transmembrane protein 45B [Source:HGNC Symbol;Acc:HGNC:25194]	17	159	0.127971	0.705389	0.392814	0.373015
MYO7B	4294.28	0.81106	0.128361	0.00173956	myosin VIIB [Source:HGNC Symbol;Acc:HGNC:7607]	57	35	-0.0310668	0.924972	0.12772	0.1993
SLITRK5	-4372.51	0.849432	0.136626	0.00264322	SLIT and NTRK like family member 5 [Source:HGNC Symbol;Acc:HGNC:20295]	77	59	0.0142331	0.266164	0.149889	0.0347429
STC1	3989.79	1.09519	0.000534328	3.52e-06	stanniocalcin 1 [Source:HGNC Symbol;Acc:HGNC:11373]	81	74	-0.0183063	0.703397	0.731103	0.78506
NTSR1	-4614.73	2.41082	8.43e-11	4.17e-13	neurotensin receptor 1 [Source:HGNC Symbol;Acc:HGNC:8039]	145	4	0.180403	0.841658	0.876524	0.760911
