# Supplementary material for: Topological Tumor Graphs: A Graph-Based Spatial Model to Infer Stromal Recruitment for Immunosuppression in Melanoma Histology
Source: Oxford University Press journal article supplement (doi:10.1158/0008-5472.can-19-2268), 2019-12-24
Supplement: 00085472can192268-sup-226045_2_supp_5947659_q2927p.xlsx [file 00085472can192268-sup-226045_2_supp_5947659_q2927p.xlsx]

## Sheet: S6
Table S5. Pathways enriched for genes downregulated in tumours with high stromal clustering
GeneSet	RatioOfProteinsInGeneSet	NumberOfProteinsInGeneSet	ProteinsFromNetwork	P-value	FDR	Nodes
Mitotic G2-G2/M phases(R)	0.0157	177	10	1.7224e-05	0.0108	RBX1,CEP70,TUBA1A,MYBL2,CEP290,PSMA4,LIN9,CEP152,PSMB9,PSMC3
Signaling by ROBO receptors(R)	0.0178	201	10	4.9968e-05	0.0133	RPL39,RPS6,RBX1,RPS25,RPLP1,PSMA4,CDC42,RPL17,PSMB9,PSMC3
Interleukin-2 family signaling(R)	0.0035	40	5	6.6885e-05	0.0133	PIK3R1,INPP5D,IL15,STAT3,IL2RA
AGE-RAGE signaling pathway in diabetic complications(K)	0.0088	99	7	8.4595e-05	0.0133	ICAM1,COL4A4,PIK3R1,JUN,VCAM1,CDC42,STAT3
Chemokine signaling pathway(K)	0.0167	189	9	0.00016644	0.0181	PIK3R1,GNGT2,CCR7,XCL1,CDC42,CCL3,CCL19,STAT2,STAT3
Non-alcoholic fatty liver disease (NAFLD)(K)	0.0132	149	8	0.00017389	0.0181	NDUFA11,COX6B1,PIK3R1,JUN,COX5B,COX5A,CDC42,NDUFA6
IL12 signaling mediated by STAT4(N)	0.0027	31	4	0.00032759	0.0292	JUN,CD3D,STAT3,IL2RA
IL12-mediated signaling events(N)	0.0054	61	5	0.00046455	0.0342	CD3D,CCL3,STAT3,GZMB,IL2RA
IL2 signaling events mediated by PI3K(N)	0.0031	35	4	0.00051569	0.0342	MYB,RPS6,PIK3R1,IL2RA
Neddylation(R)	0.0197	223	9	0.00055139	0.0342	FBXO2,FBXO10,RBX1,COPS6,PSMA4,PSMB9,SPSB1,PSMC3,ASB9
role of pi3k subunit p85 in regulation of actin organization and cell migration(B)	0.0014	16	3	0.00065385	0.0373	PIK3R1,ARPC1B,CDC42
RNA Polymerase II Transcription(R)	0.0783	885	20	0.0007535	0.0392	MYB,COX6B1,RBX1,CSTF3,TWIST1,PRDX1,JUN,THRA,MYBL2,TBP,MMP13,PSMA4,COX5B,COX5A,RBBP8,MBD3,PSMB9,RAD51,PSMC3,IL2RA
Class I MHC mediated antigen processing & presentation(R)	0.0168	190	8	0.00085771	0.0412	FBXO2,FBXO10,RBX1,TLR1,PSMA4,PSMB9,SPSB1,PSMC3
Ribosome(K)	0.0135	153	7	0.0011295	0.0448	RPL39,RPS6,MRPL27,RPS25,RPLP1,MRPS21,RPL17
Eukaryotic Translation Initiation(R)	0.0099	112	6	0.0011595	0.0448	RPL39,RPS6,RPS25,EIF5,RPLP1,RPL17
S Phase(R)	0.0138	156	7	0.0012617	0.0448	LIG1,RBX1,CDC6,PSMA4,LIN9,PSMB9,PSMC3
Interleukin-10 signaling(R)	0.004	45	4	0.001302	0.0448	ICAM1,CCL3,CCL19,STAT3
Synthesis of DNA(R)	0.0104	117	6	0.0014456	0.0448	LIG1,RBX1,CDC6,PSMA4,PSMB9,PSMC3
Notch-mediated HES/HEY network(N)	0.0042	47	4	0.0015251	0.0448	MYB,TWIST1,RBBP8,STAT3
CXCR4-mediated signaling events(N)	0.0071	80	5	0.0015437	0.0448	INPP5D,CD3D,CDC42,STAT2,STAT3
Signaling events mediated by Hepatocyte Growth Factor Receptor (c-Met)(N)	0.0071	80	5	0.0015437	0.0448	PIK3R1,INPP5D,JUN,ARF6,CDC42
Huntington disease(P)	0.0107	121	6	0.0017109	0.0463	ACTG2,JUN,ARPC1B,TBP,ARF6,CDC42
NoRC negatively regulates rRNA expression(R)	0.0043	49	4	0.0017735	0.0463	SAP30BP,TBP,SAP18,MBD2
Peroxisome(K)	0.0073	83	5	0.0018109	0.0463	PRDX1,PEX2,HMGCL,PEX10,DHRS4
TCR signaling(R)	0.0109	123	6	0.0018567	0.0463	PIK3R1,INPP5D,CD3D,PSMA4,PSMB9,PSMC3
Eukaryotic Translation Elongation(R)	0.0075	85	5	0.0020069	0.0463	RPL39,RPS6,RPS25,RPLP1,RPL17
Eukaryotic Translation Termination(R)	0.0076	86	5	0.0021106	0.0463	RPL39,RPS6,RPS25,RPLP1,RPL17
Salmonella infection(K)	0.0076	86	5	0.0021106	0.0463	PFN1,JUN,ARPC1B,CDC42,CCL3
tpo signaling pathway(B)	0.0022	25	3	0.0023316	0.0463	PIK3R1,JUN,STAT3
Mitotic Prometaphase(R)	0.0155	175	7	0.0024045	0.0463	DSN1,CEP70,NDC80,TUBA1A,CEP290,ITGB3BP,CEP152
MAPK6/MAPK4 signaling(R)	0.0079	89	5	0.002445	0.0463	JUN,PSMA4,CDC42,PSMB9,PSMC3
IL2-mediated signaling events(N)	0.0048	54	4	0.0025148	0.0463	PIK3R1,JUN,STAT3,IL2RA
pdgf signaling pathway(B)	0.0023	26	3	0.0026031	0.0463	PIK3R1,JUN,STAT3
Fc gamma R-mediated phagocytosis(K)	0.0081	91	5	0.0026883	0.0463	PIK3R1,INPP5D,ARPC1B,ARF6,CDC42
Mitotic G1-G1/S phases(R)	0.0119	134	6	0.0028338	0.0463	CDC6,MYBL2,PSMA4,LIN9,PSMB9,PSMC3
Signaling events mediated by HDAC Class I(N)	0.005	56	4	0.0028632	0.0463	SAP18,MBD3,MBD2,STAT3
Calcium signaling in the CD4+ TCR pathway(N)	0.0024	27	3	0.0028935	0.0463	CREM,JUN,IL2RA
