# Supplementary material for: Topological Tumor Graphs: A Graph-Based Spatial Model to Infer Stromal Recruitment for Immunosuppression in Melanoma Histology
Source: Oxford University Press journal article supplement (doi:10.1158/0008-5472.can-19-2268), 2019-12-24
Supplement: 00085472can192268-sup-226045_2_supp_5947660_q2927p.xlsx [file 00085472can192268-sup-226045_2_supp_5947660_q2927p.xlsx]

## Sheet: S4
Table S6. Pathways enriched for genes upregulated in tumours with high stromal barrier
GeneSet	RatioOfProteinsInGeneSet	NumberOfProteinsInGeneSet	ProteinsFromNetwork	P-value	FDR	Nodes
Parkinson disease(P)	0.0054	61	5	9.3649e-05	0.0411	YWHAH,PSMB3,NDUFV2,HSPA8,HSPA1B
Processing of Capped Intron-Containing Pre-mRNA(R)	0.0209	236	8	0.00035405	0.0775	USP39,BUD31,WBP4,PCBP1,ZMAT5,POLR2H,POLR2K,HSPA8
Mitochondrial translation(R)	0.0082	93	5	0.00064263	0.0907	GFM1,MRPS11,MRPS21,MRPL43,MRPL30
Non-alcoholic fatty liver disease (NAFLD)(K)	0.0132	149	6	0.00083226	0.0907	TNFRSF1A,CYP2E1,NDUFB8,NDUFB5,PIK3R2,NDUFV2
