# Supplementary material for: Topological Tumor Graphs: A Graph-Based Spatial Model to Infer Stromal Recruitment for Immunosuppression in Melanoma Histology
Source: Oxford University Press journal article supplement (doi:10.1158/0008-5472.can-19-2268), 2019-12-24
Supplement: 00085472can192268-sup-226045_2_supp_5947670_q2927p.xlsx [file 00085472can192268-sup-226045_2_supp_5947670_q2927p.xlsx]

## Sheet: S9
Table S9. Comparison of pathways enriched for genes correlated with stromal barrier, as identified by CNx and lol
Enriched Pathways	Stromal Barrier				negative correlated pathways
Identified by	CNx	lol			positive correlated pathways
Transmission across Electrical Synapses (R)
PIP3 activates AKT signaling(R)
Relaxin signaling pathway(K)
Adrenergic signaling in cardiomyocytes(K)
Phospholipase D signaling pathway(K)
Platelet Aggregation (Plug Formation)(R)
SUMOylation(R)
Ubiquitin mediated proteolysis(K)
Wnt signaling pathway(P)
Interleukin signaling pathway(P)
Wnt signaling pathway(K)
PI3K-Akt signaling pathway(K)
P53 pathway feedback loops 1(P)
basic mechanisms of sumoylation(B)
Parathyroid hormone synthesis, secretion and action(K)
Integrin alphaIIb beta3 signaling(R)
Costimulation by the CD28 family(R)
MAPK signaling pathway(K)
RNA Polymerase II Transcription(R)
Eukaryotic Translation Initiation(R)
Long-term potentiation(K)
TCR signaling in naive CD4+ T cells(N)
Mitotic Prophase(R)
ISG15 antiviral mechanism(R)
Neurotrophin signaling pathway(K)
Cell Cycle Checkpoints(R)
Oocyte meiosis(K)
Gene Silencing by RNA(R)
Smooth Muscle Contraction(R)
Estrogen signaling pathway(K)
Keratinization(R)
Signaling events mediated by TCPTP(N)
Trk receptor signaling mediated by PI3K and PLC-gamma(N)
EGF receptor signaling pathway(P)
Signaling by SCF-KIT(R)
IL3-mediated signaling events(N)
EGF receptor (ErbB1) signaling pathway(N)
Signaling events mediated by PTP1B(N)
GMCSF-mediated signaling events(N)
Sulfur relay system(K)
E-cadherin signaling in keratinocytes(N)
Interleukin-2 family signaling(R)
PDGFR-beta signaling pathway(N)
Non-small cell lung cancer(K)
Signaling by ERBB2(R)
Growth hormone receptor signaling(R)
JAK-STAT signaling pathway(K)
Viral carcinogenesis(K)
Signaling by Leptin(R)
Signaling by PDGF(R)
Signaling by PTK6(R)
IL2-mediated signaling events(N)
IL5-mediated signaling events(N)
ErbB signaling pathway(K)
a6b1 and a6b4 Integrin signaling(N)
Proteoglycans in cancer(K)
ErbB2/ErbB3 signaling events(N)
Interleukin-3, Interleukin-5 and GM-CSF signaling(R)
Acute myeloid leukemia(K)
Sulfur amino acid metabolism(R)
E2F transcription factor network(N)
Prolactin signaling pathway(K)
Signaling by ERBB4(R)
Th17 cell differentiation(K)
Hepatitis B(K)
Interleukin-7 signaling(R)
FGF signaling pathway(N)
Interleukin-6 family signaling(R)
Interleukin-4 and Interleukin-13 signaling(R)
Posttranslational regulation of adherens junction stability and dissassembly(N)
Parkinson disease(P)
Processing of Capped Intron-Containing Pre-mRNA(R)
Mitochondrial translation(R)
Non-alcoholic fatty liver disease (NAFLD)(K)
